# Supplementary material for: DNA interactions and biological activity of 2,9-disubstituted 1,10-phenanthroline thiosemicarbazone-based ligands and a 4-phenylthiazole derivative
Source: Preprints.org preprint supplement (doi:10.20944/preprints202401.1091.v1), 2024-01-15
Supplement: Supplementary file 1 [file supplementary]

# DNA interactions and biological activity of 2,9-disubstituted 1,10-phenanthroline thiosemicarbazone-based ligands and a 4-phenylthiazole derivative

Álvaro Nicolás,<sup>a,b</sup> Julia G. Quero,<sup>a</sup> Marta Barroso,<sup>a</sup> Zoila Gándara,<sup>a,b\*</sup> and Lourdes Gude<sup>a,b\*</sup>

<sup>a</sup>Universidad de Alcalá, Departamento de Química Orgánica y Química Inorgánica, Instituto de Investigación Química “Andrés M. del Río” (IQAR), 28805-Alcalá de Henares, Madrid, Spain.

<sup>b</sup>Grupo DISCOBAC, Instituto de Investigación Sanitaria de Castilla-La Mancha (IDISCAM), Spain.

|                                                                                                                                                                                   |                  |
|-----------------------------------------------------------------------------------------------------------------------------------------------------------------------------------|------------------|
| <sup>1</sup> H, <sup>13</sup> C, <sup>1</sup> H- <sup>1</sup> H-COSY, <sup>1</sup> H- <sup>13</sup> C-HSQC and <sup>1</sup> H- <sup>13</sup> C-HMBC NMR spectra of <b>1</b> ..... | Figures S1-S5    |
| <sup>1</sup> H, <sup>13</sup> C, <sup>19</sup> F and <sup>31</sup> P NMR spectra of <b>2</b> .....                                                                                | Figures S6-S9    |
| <sup>1</sup> H, <sup>13</sup> C and <sup>19</sup> F spectra of <b>3</b> .....                                                                                                     | Figures S10-S12  |
| <sup>1</sup> H and <sup>13</sup> C NMR spectra of <b>4</b> .....                                                                                                                  | Figures S13, S14 |
| Zoomed view of high-resolution electrospray ionization mass spectrum (ESI-HRMS-pos) of <b>1</b> (MeOH, 1% formic acid) .....                                                      | Figure S15       |
| Zoomed view of high-resolution electrospray ionization mass spectrum (ESI-HRMS-pos) of <b>2</b> (MeOH, 1% formic acid).....                                                       | Figure S16       |
| High-resolution electrospray ionization mass spectrum (ESI-HRMS-pos) of <b>3</b> (MeOH, 1% formic acid).....                                                                      | Figure S17       |
| Zoomed view of high-resolution electrospray ionization mass spectrum (ESI-HRMS-pos) of <b>4</b> (MeOH, 1% formic acid).....                                                       | Figure S18       |
| Cell cycle assay histograms obtained by flow cytometry in HeLa cells treated with <b>1</b> or <b>2</b> (1/2 IC <sub>50</sub> concentrations, 72 h).....                           | Figure S19       |

DMSO-d<sub>6</sub>

— 11.99

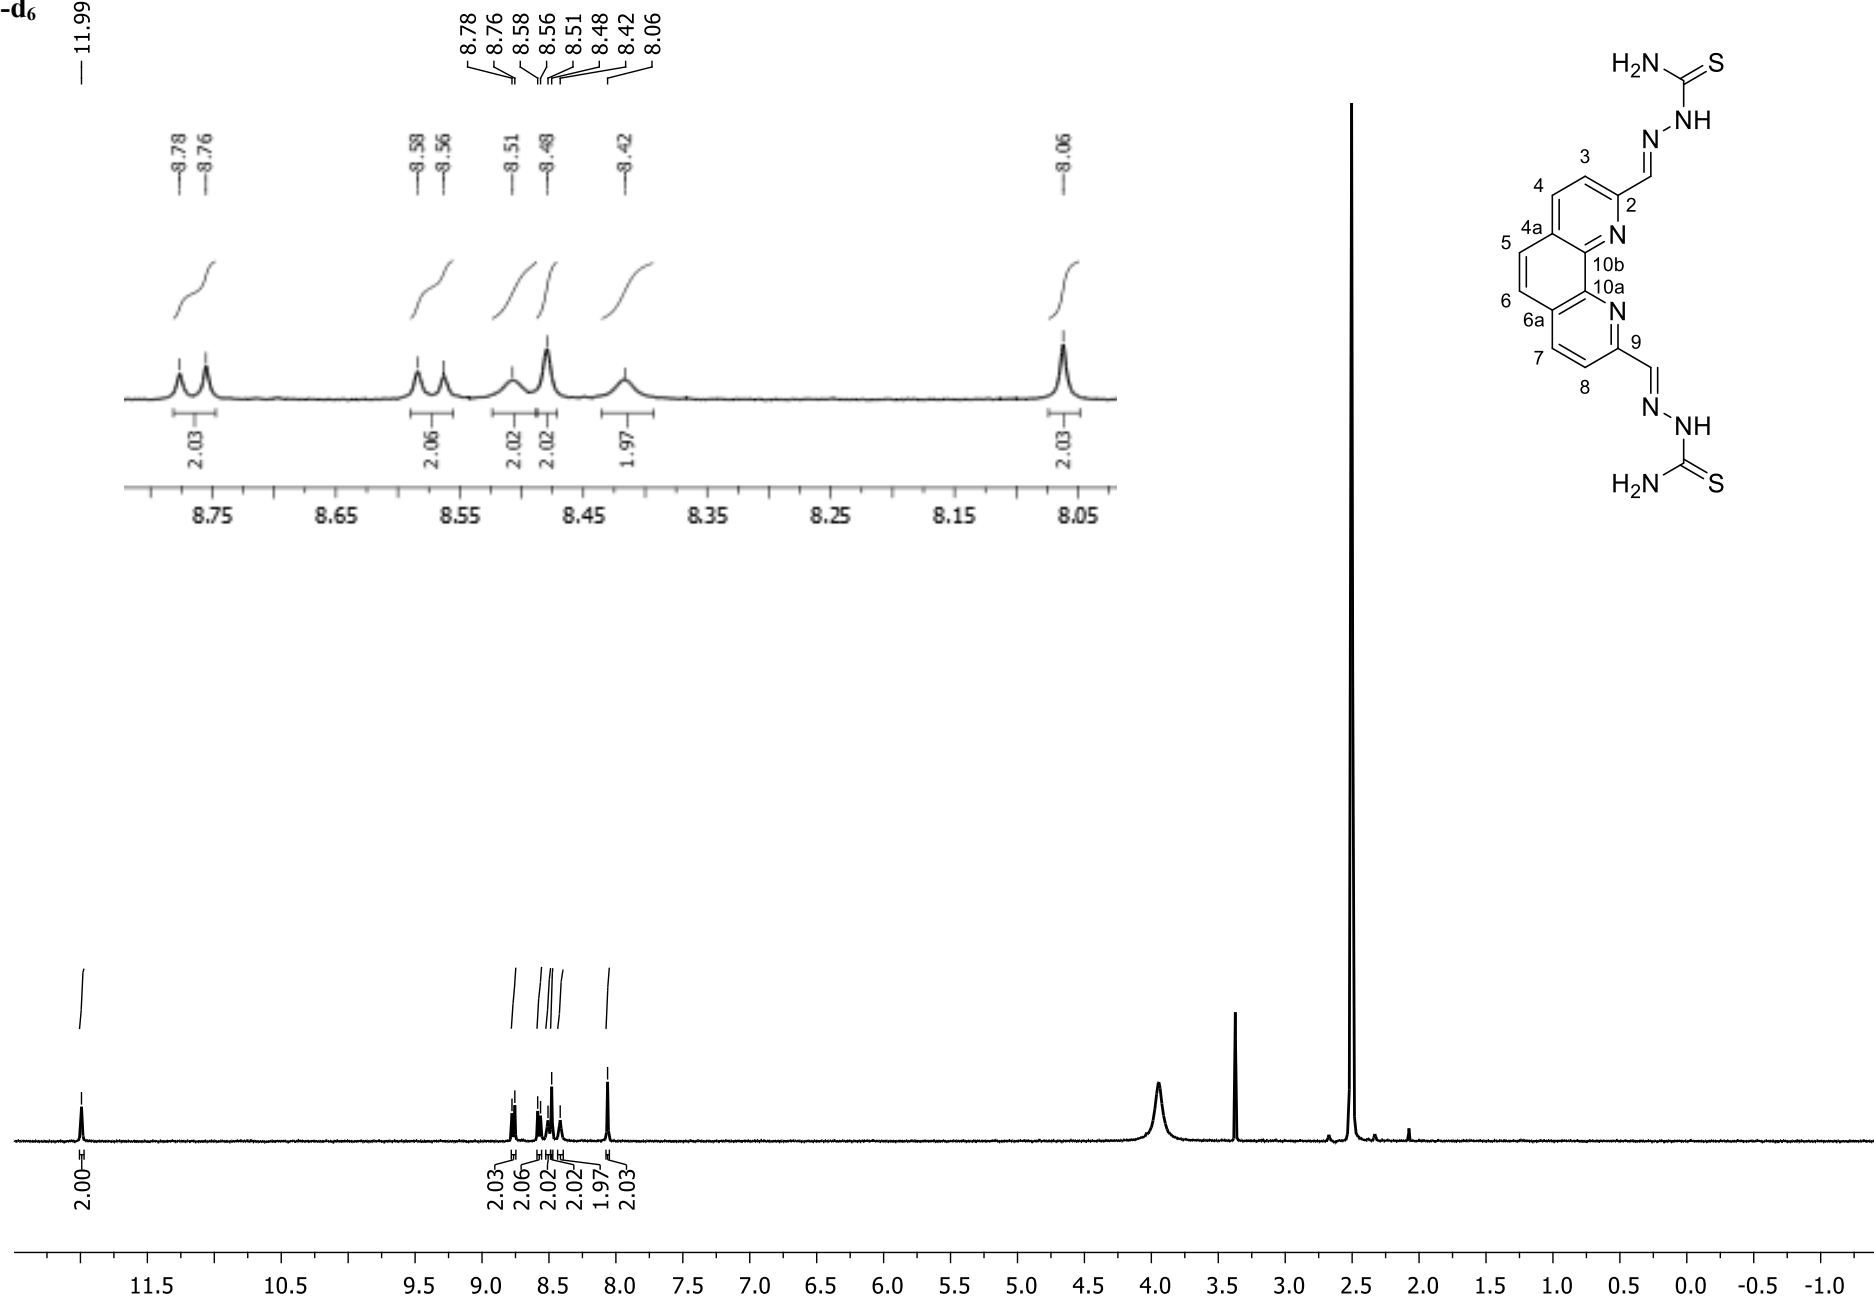

Figure S1. <sup>1</sup>H NMR (400 MHz, DMSO-d<sub>6</sub>) of **1**

DMSO-d<sub>6</sub>

— 179.1  
— 153.7  
~ 143.1  
~ 141.4  
~ 138.4  
~ 129.4  
~ 127.6  
~ 121.1

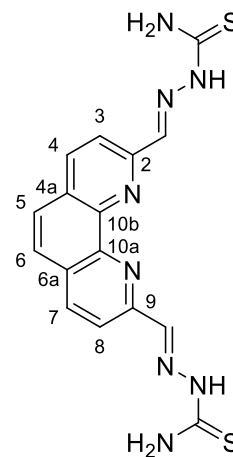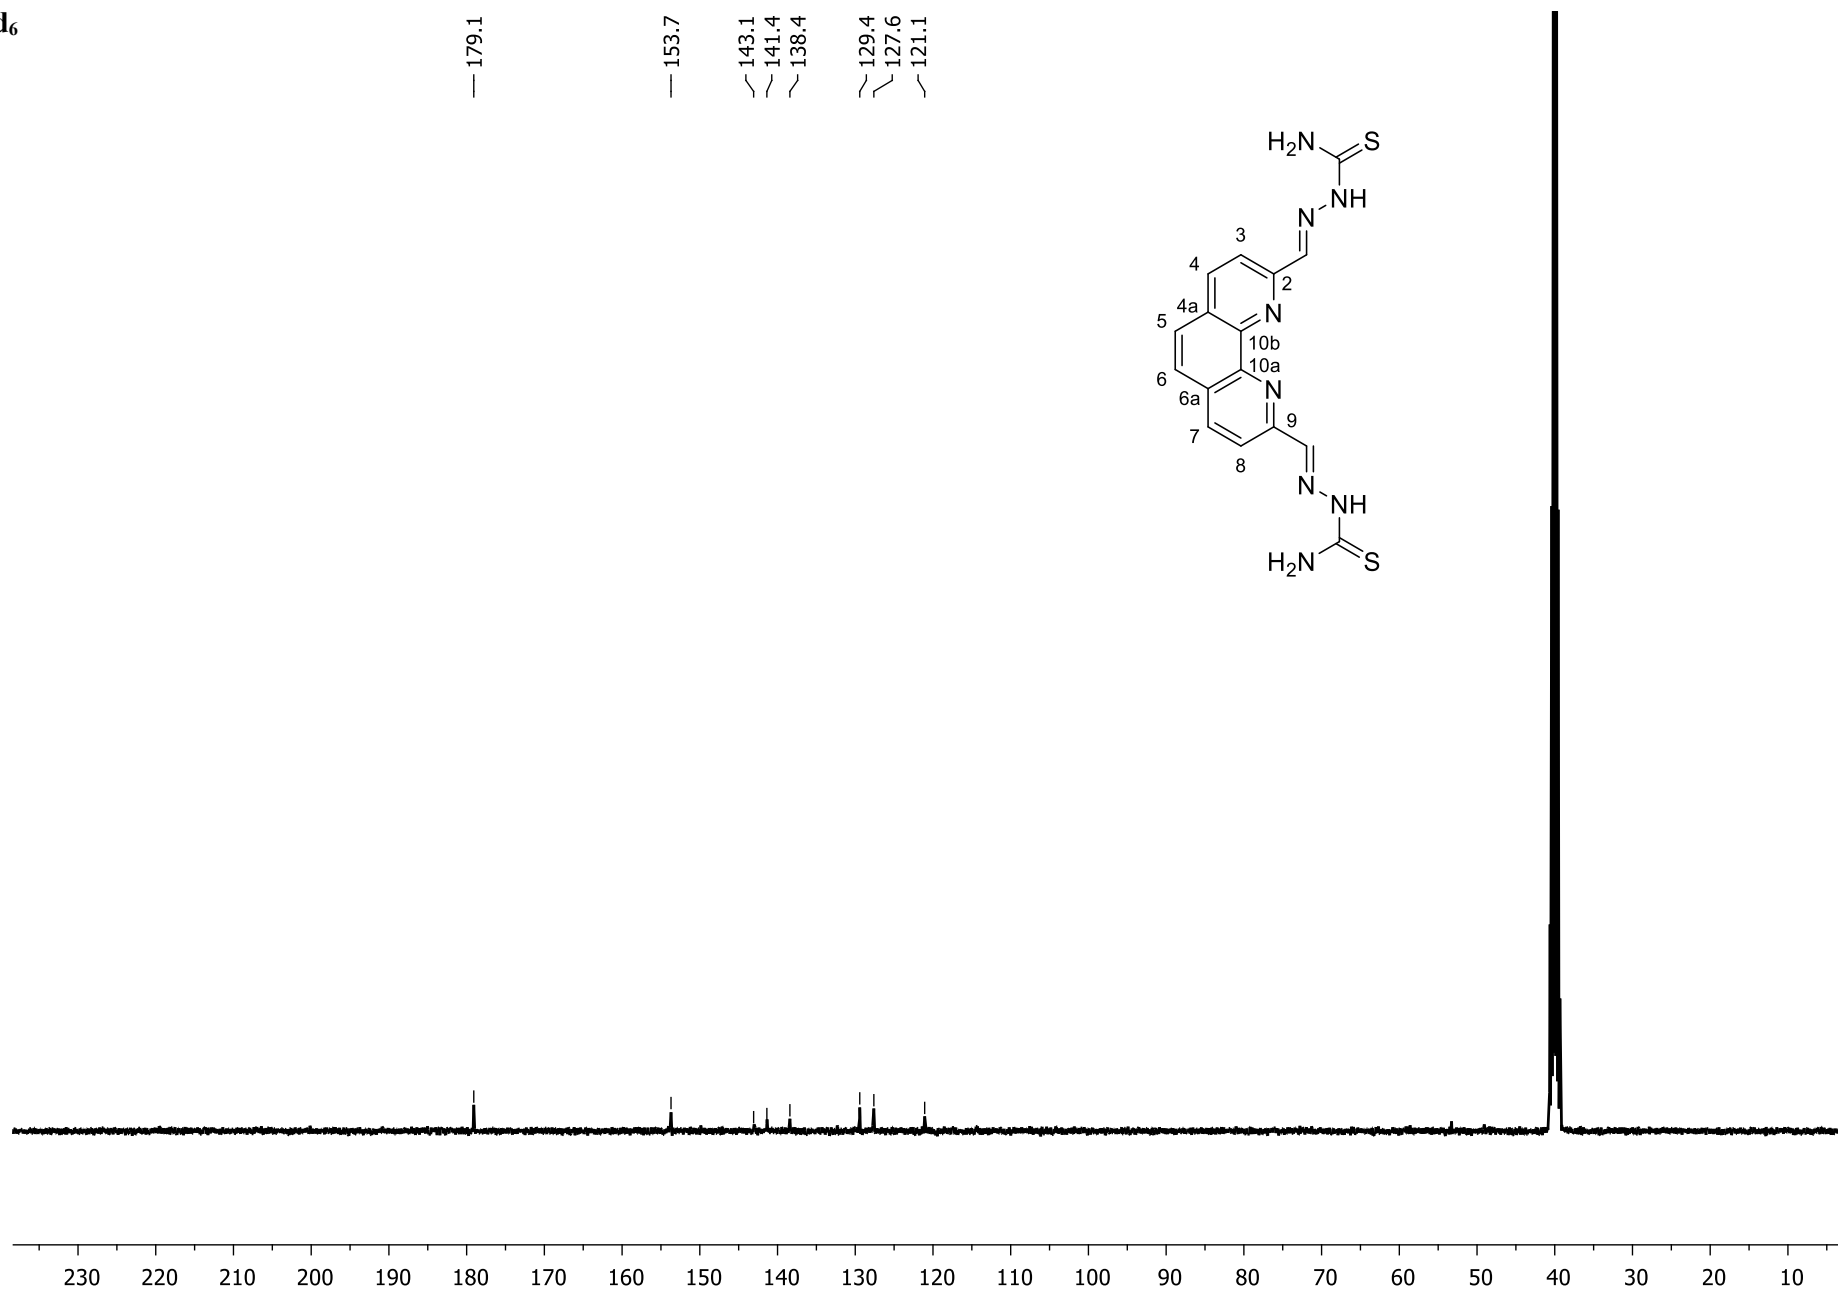

Figure S2. <sup>13</sup>C NMR (101 MHz, DMSO-d<sub>6</sub>) of **1**

DMSO-d<sub>6</sub>

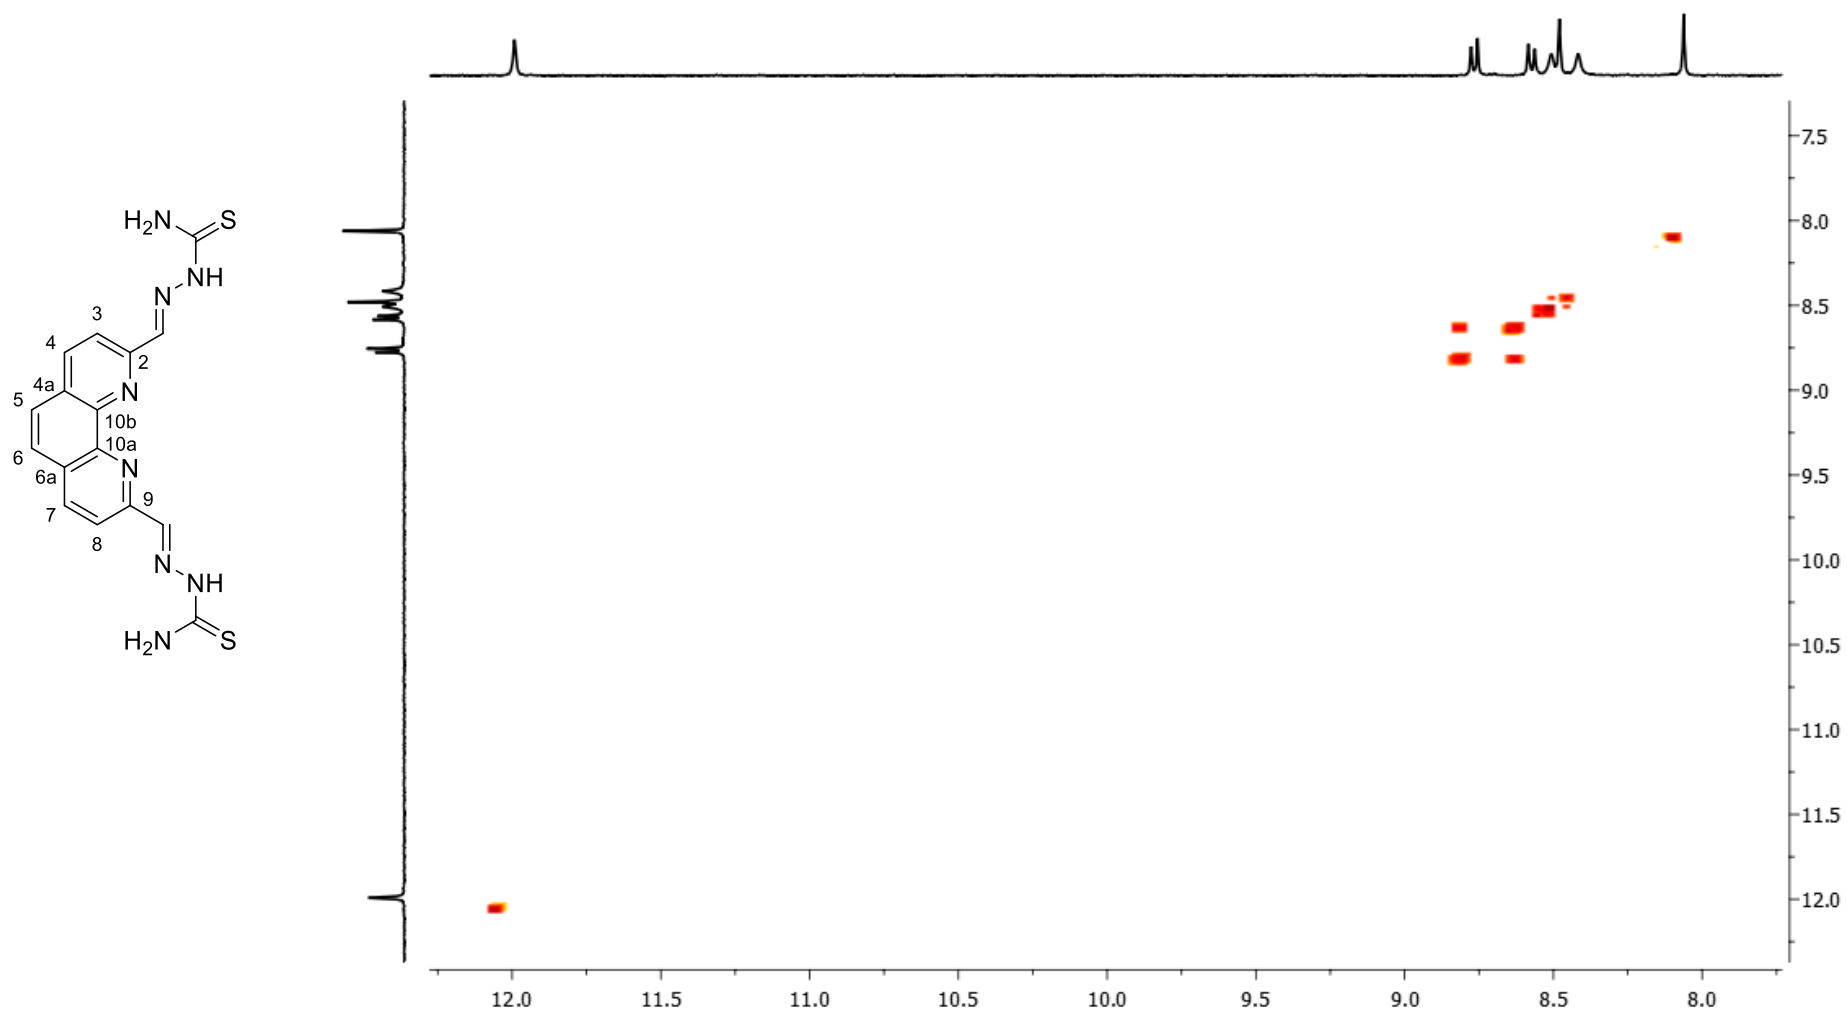

Figure S3. <sup>1</sup>H-<sup>1</sup>H-COSY (400 MHz, DMSO-d<sub>6</sub>) of **1**

DMSO-d<sub>6</sub>

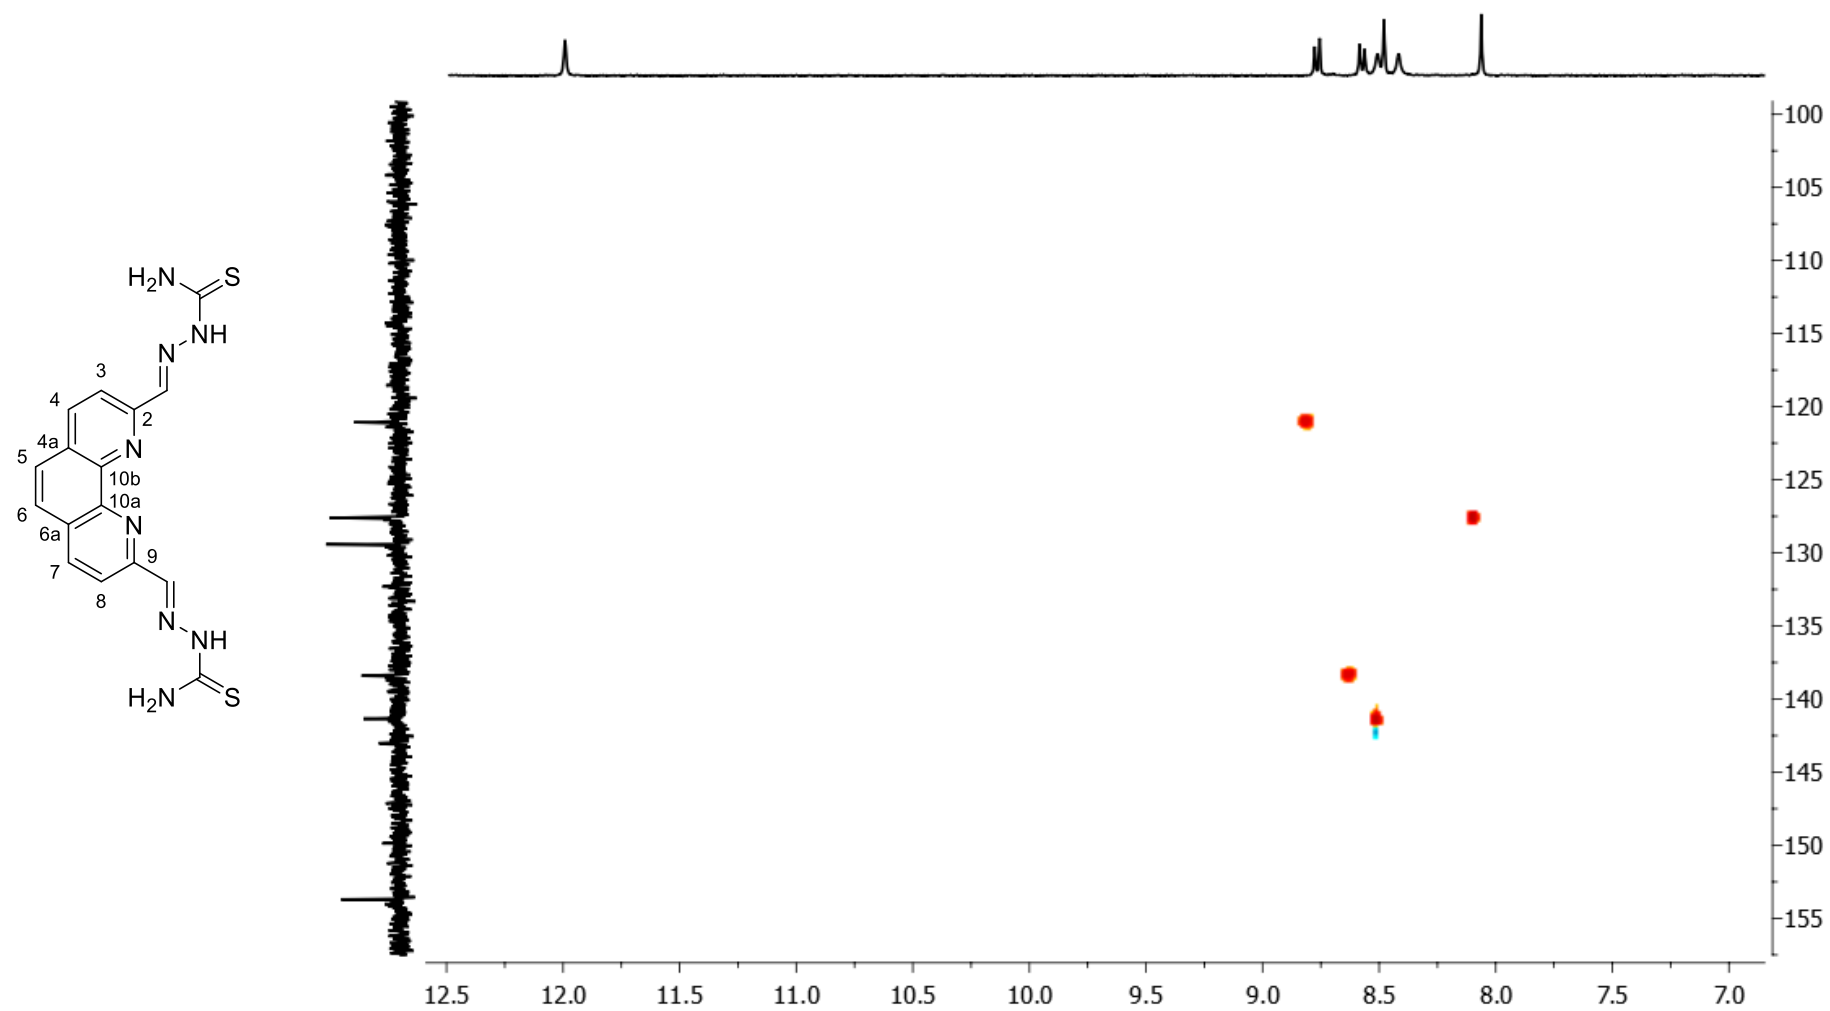

Figure S4. <sup>1</sup>H-<sup>13</sup>C-HSQC (400 MHz, DMSO-d<sub>6</sub>) of **1**

DMSO-d<sub>6</sub>

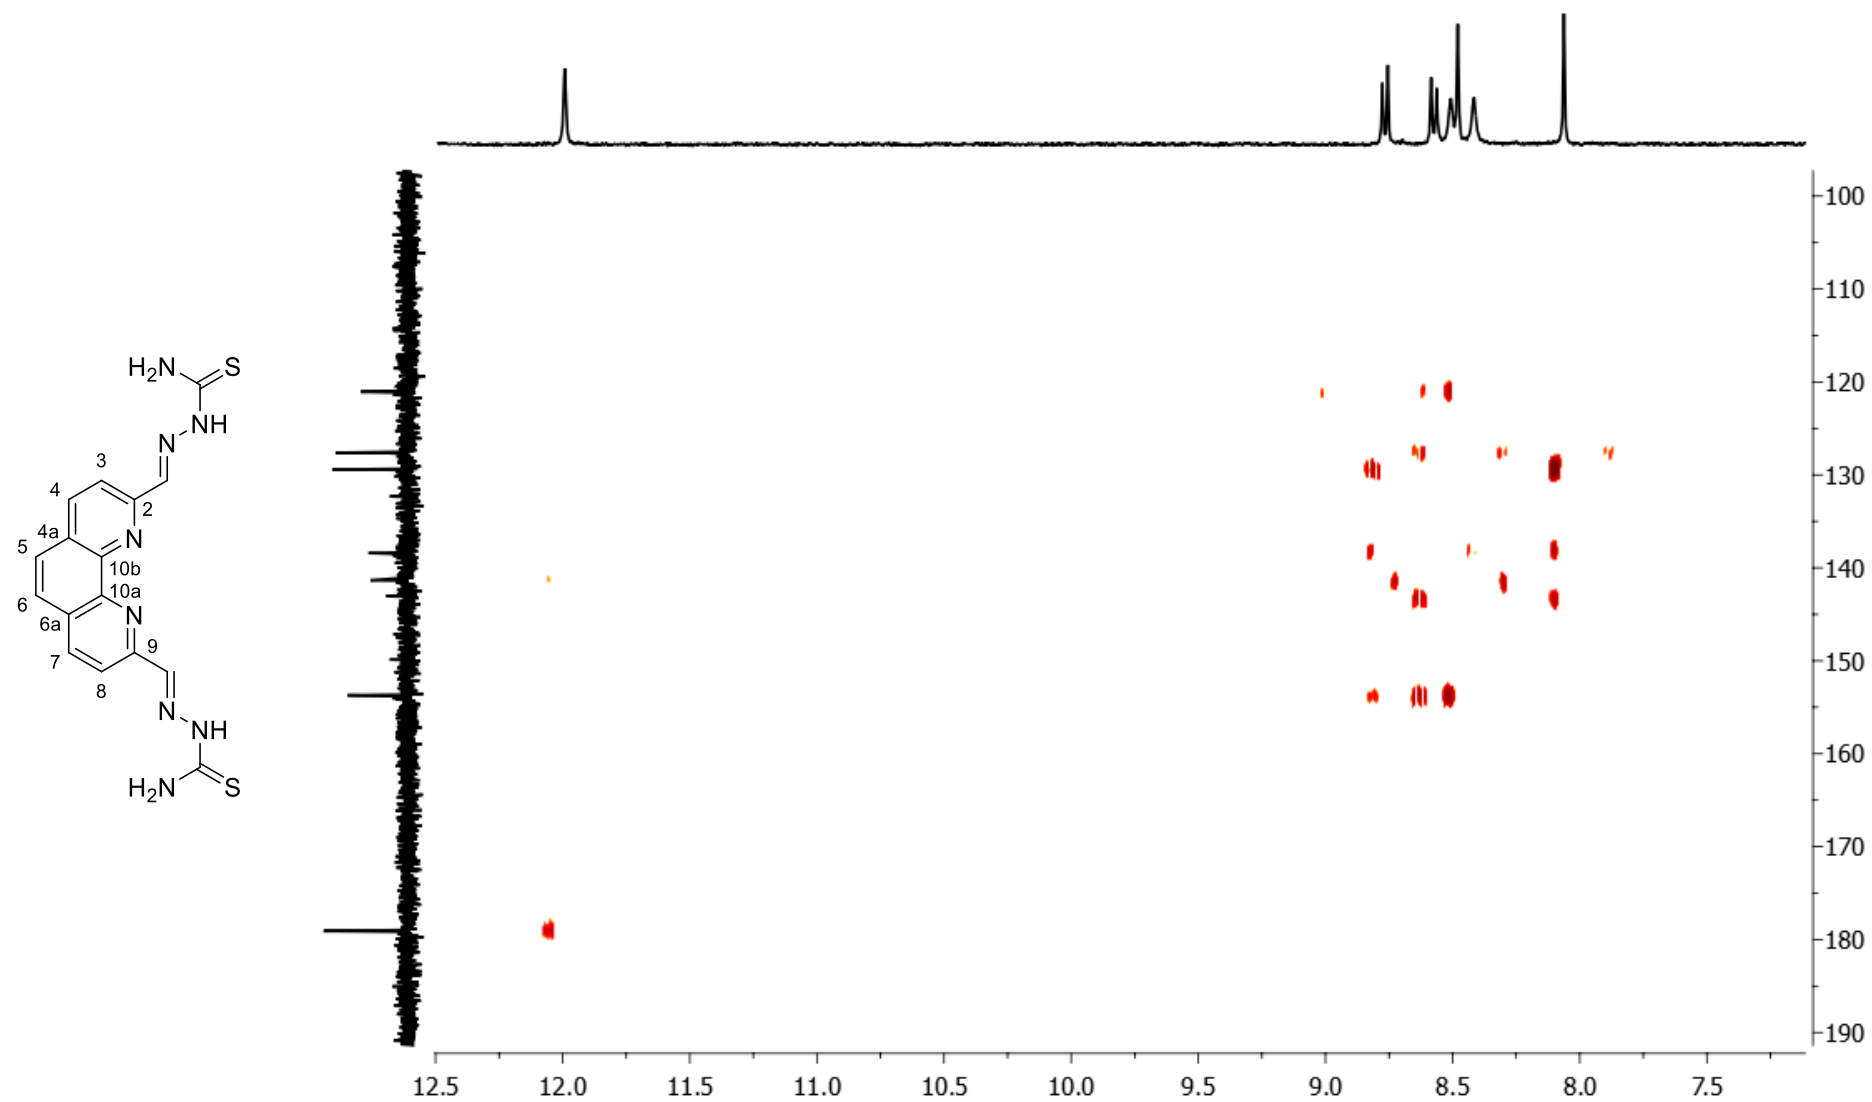

**Figure S5.** <sup>1</sup>H-<sup>13</sup>C-HMBC (400 MHz, DMSO-d<sub>6</sub>) of **1**

DMSO-d<sub>6</sub>

— 12.02

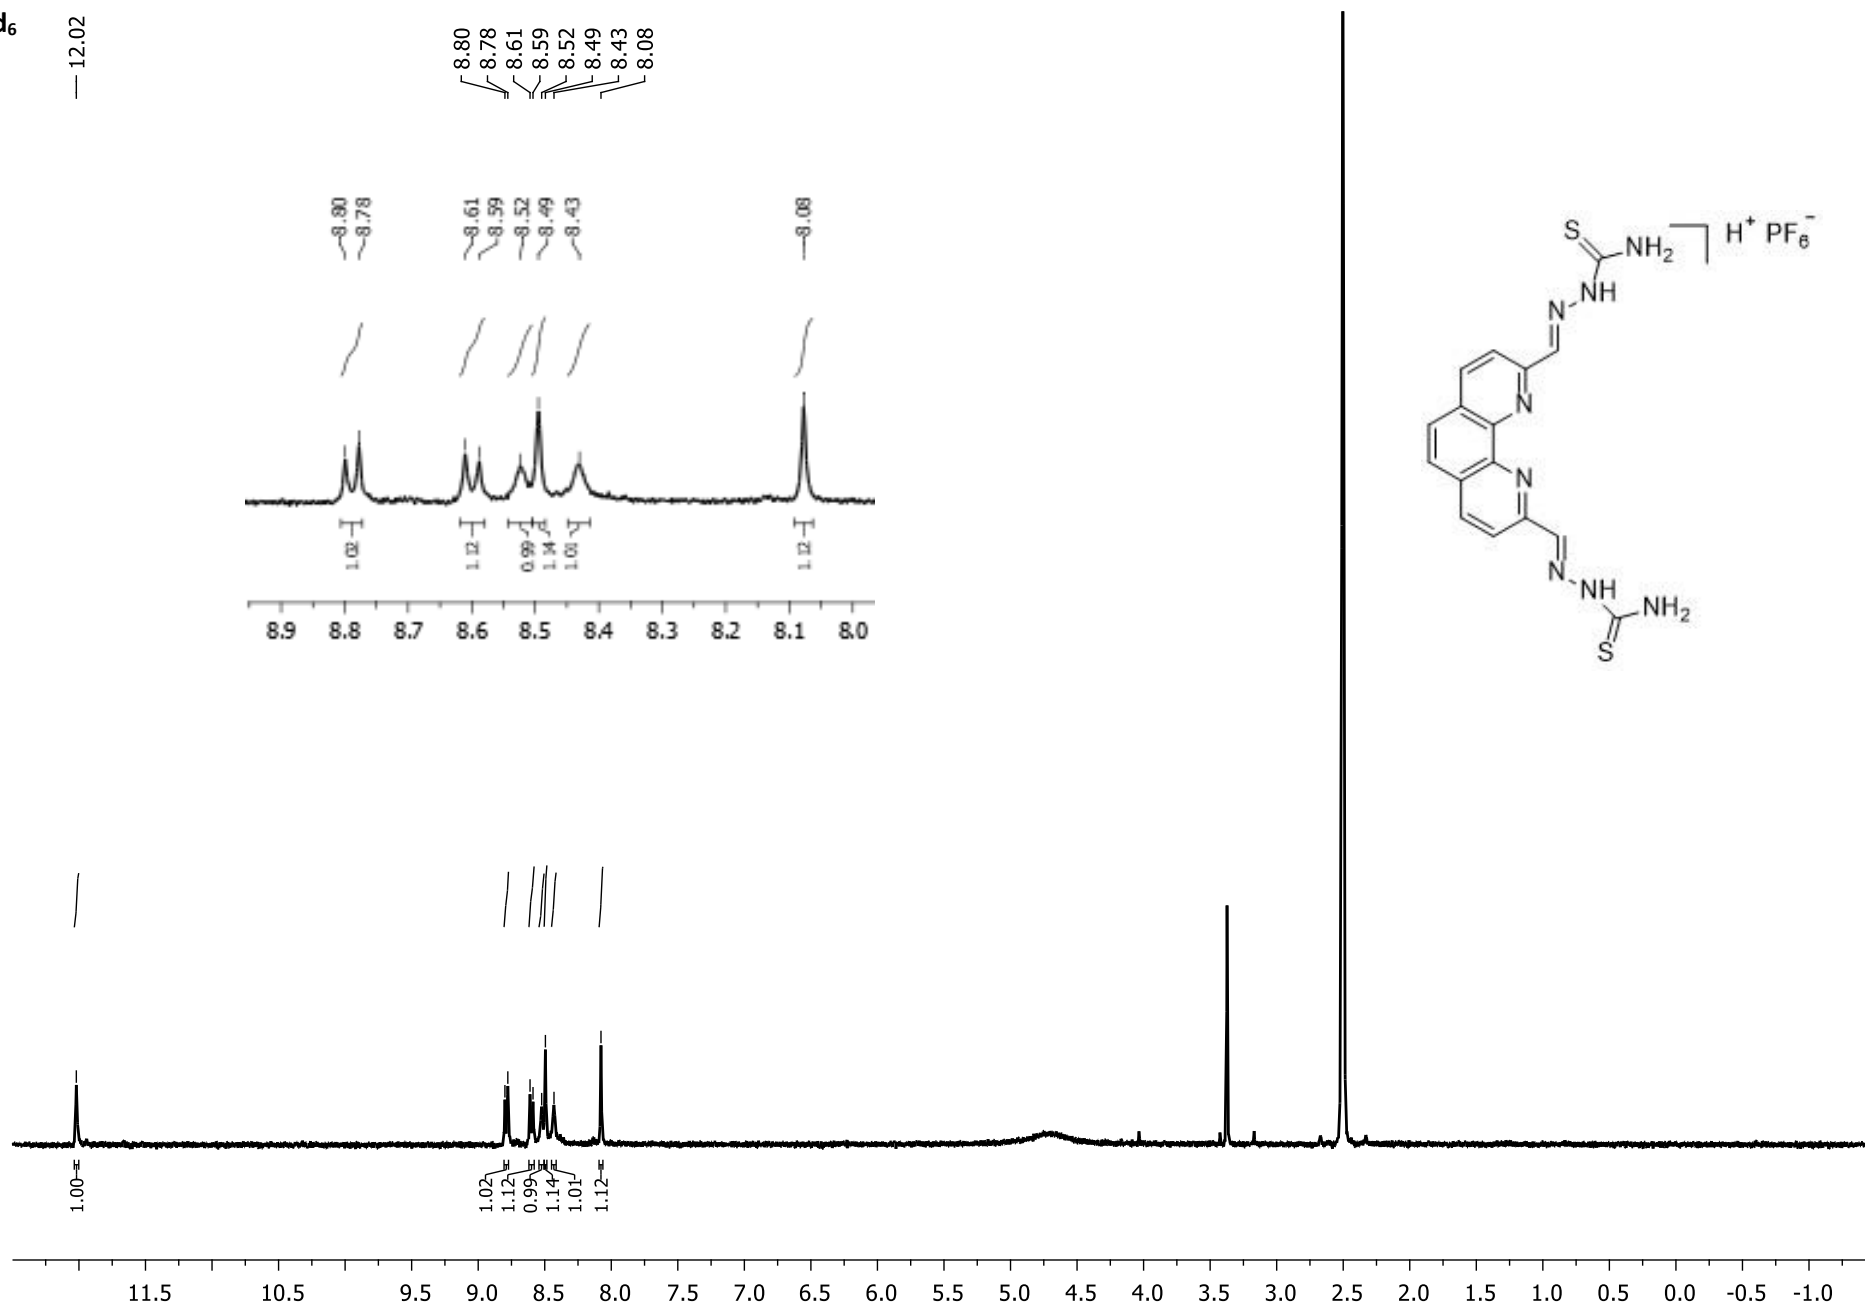

Figure S6. <sup>1</sup>H NMR (400 MHz, DMSO-d<sub>6</sub>) of 2

DMSO-d<sub>6</sub>

— 179.0

— 154.0

— 144.5

— 142.4

— 137.6

— 129.3

— 127.5

— 120.7

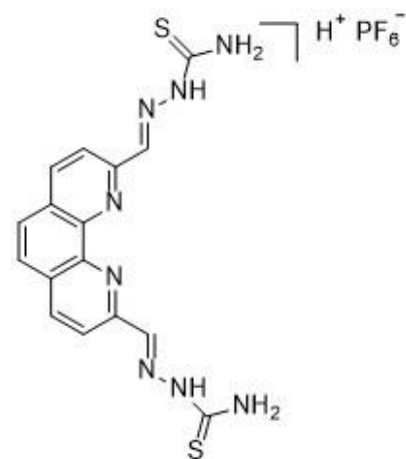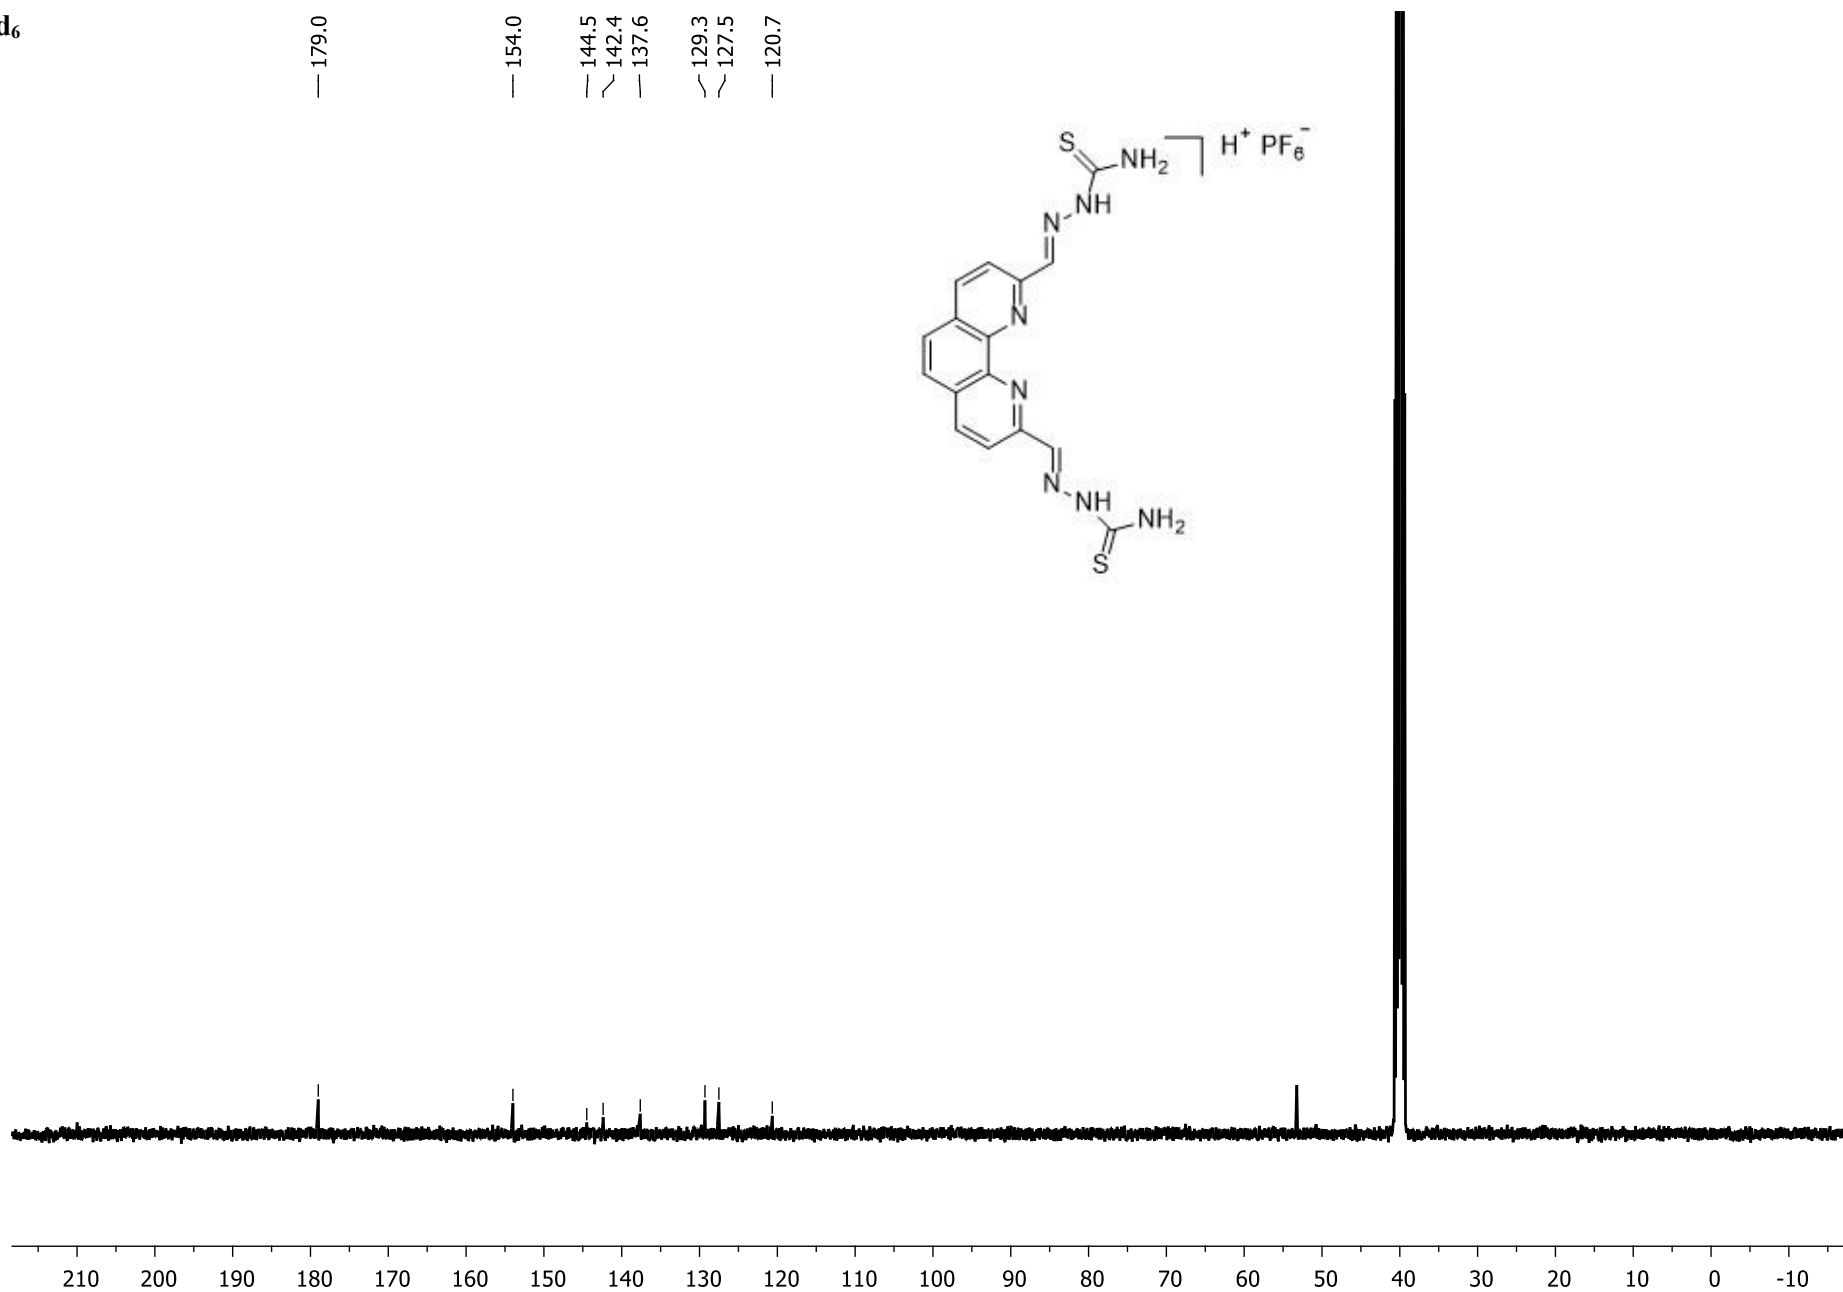

Figure S7. <sup>13</sup>C NMR (101 MHz, DMSO-d<sub>6</sub>) of **2**

DMSO-d<sub>6</sub>

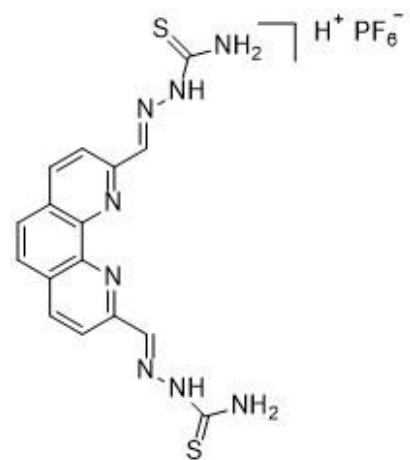

-69.20  
-71.08

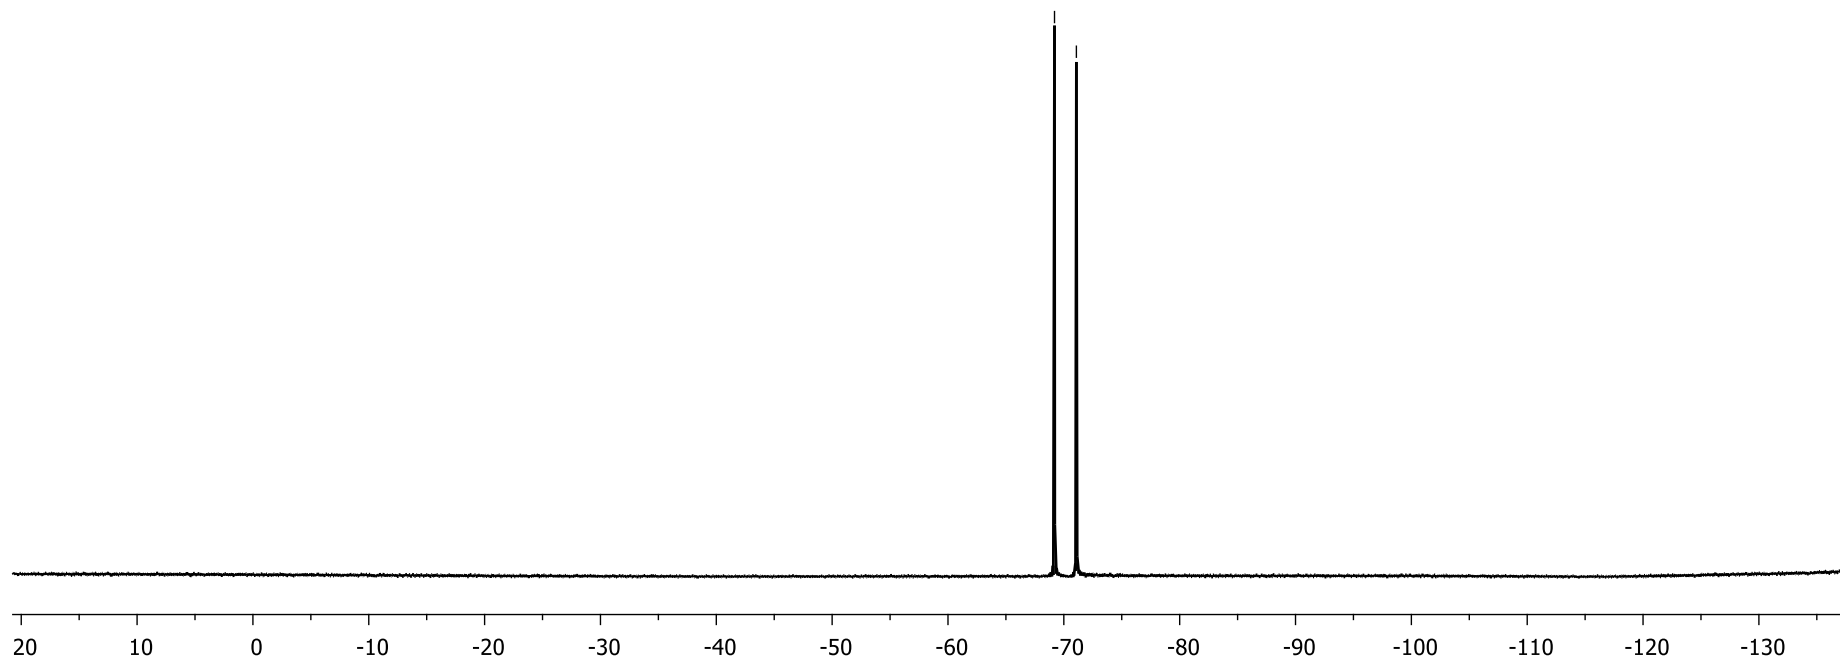

Figure S8. <sup>19</sup>F NMR (376 MHz, DMSO-d<sub>6</sub>) of **2**

DMSO-d<sub>6</sub>

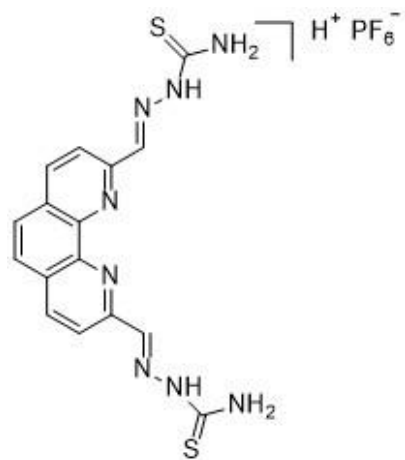

-131.02  
-135.42  
-139.81  
-144.20  
-148.59  
-152.98  
-157.37

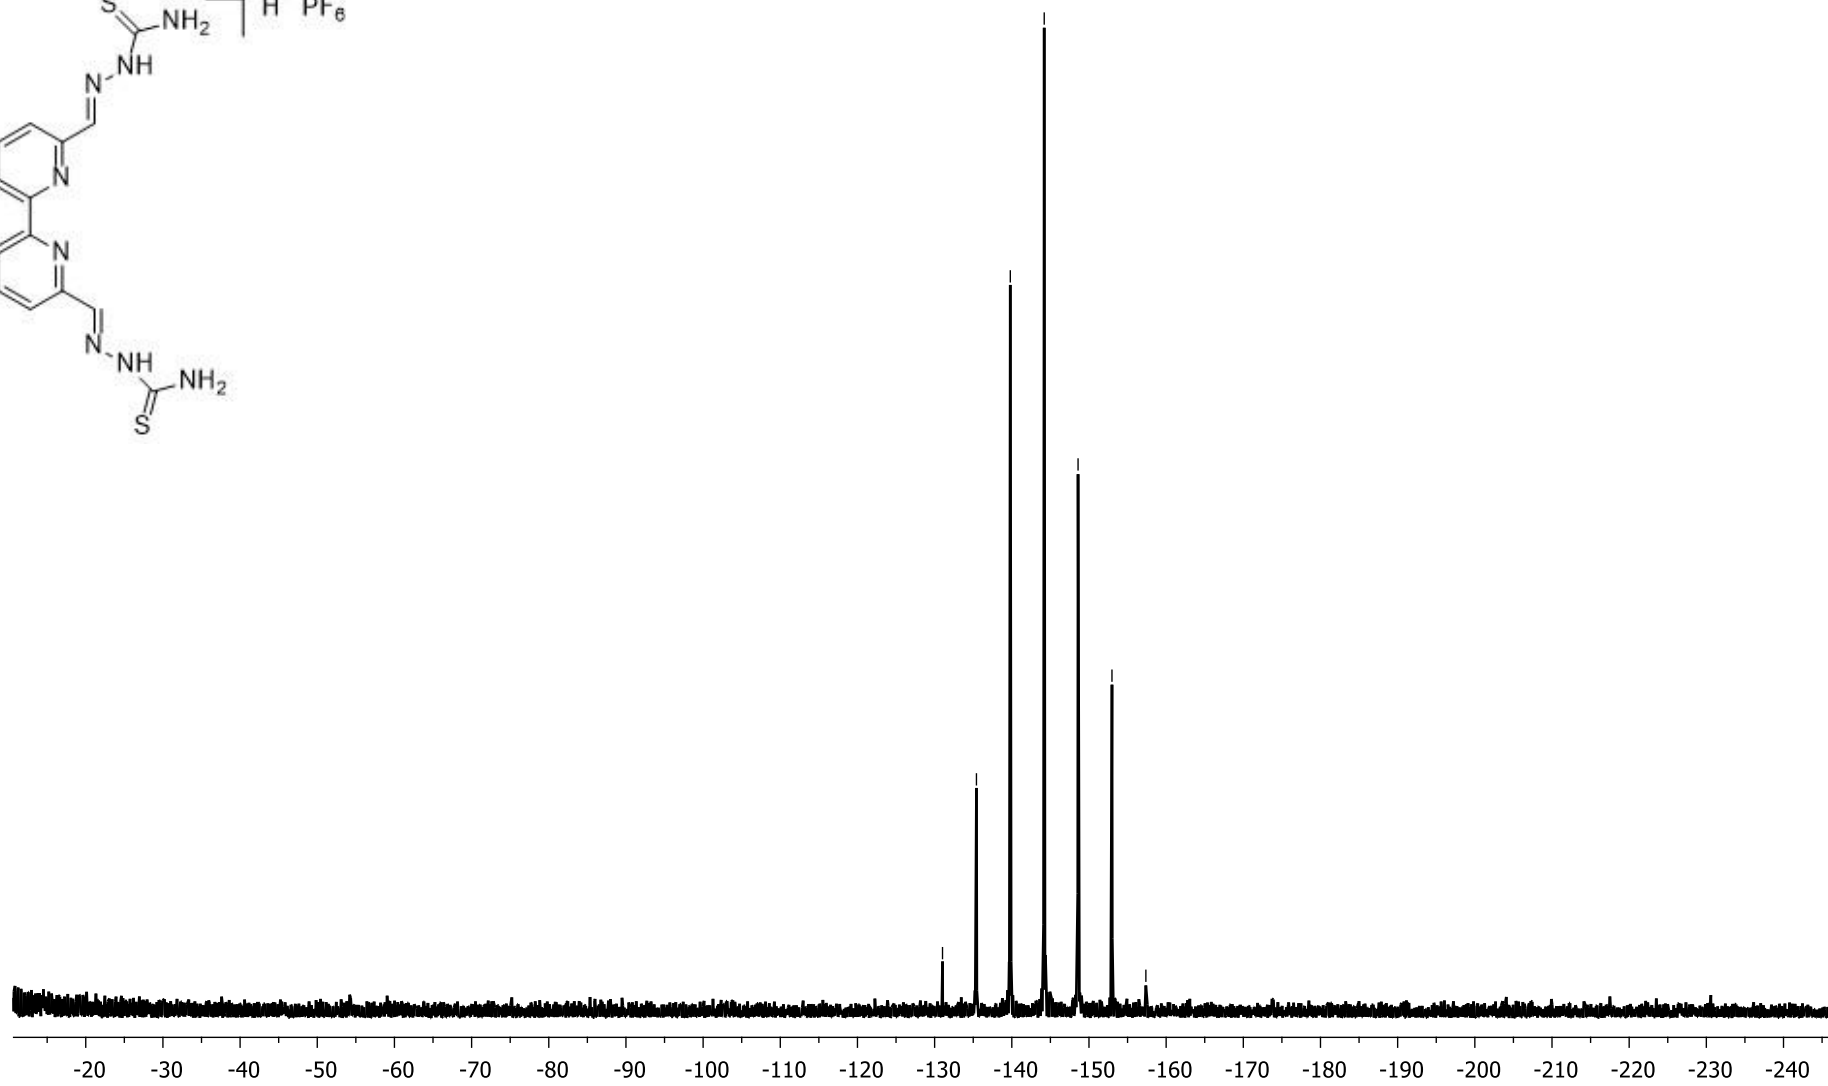

Figure S9. <sup>31</sup>P NMR (162 MHz, DMSO-d<sub>6</sub>) of 2

DMSO-d<sub>6</sub>

—12.01

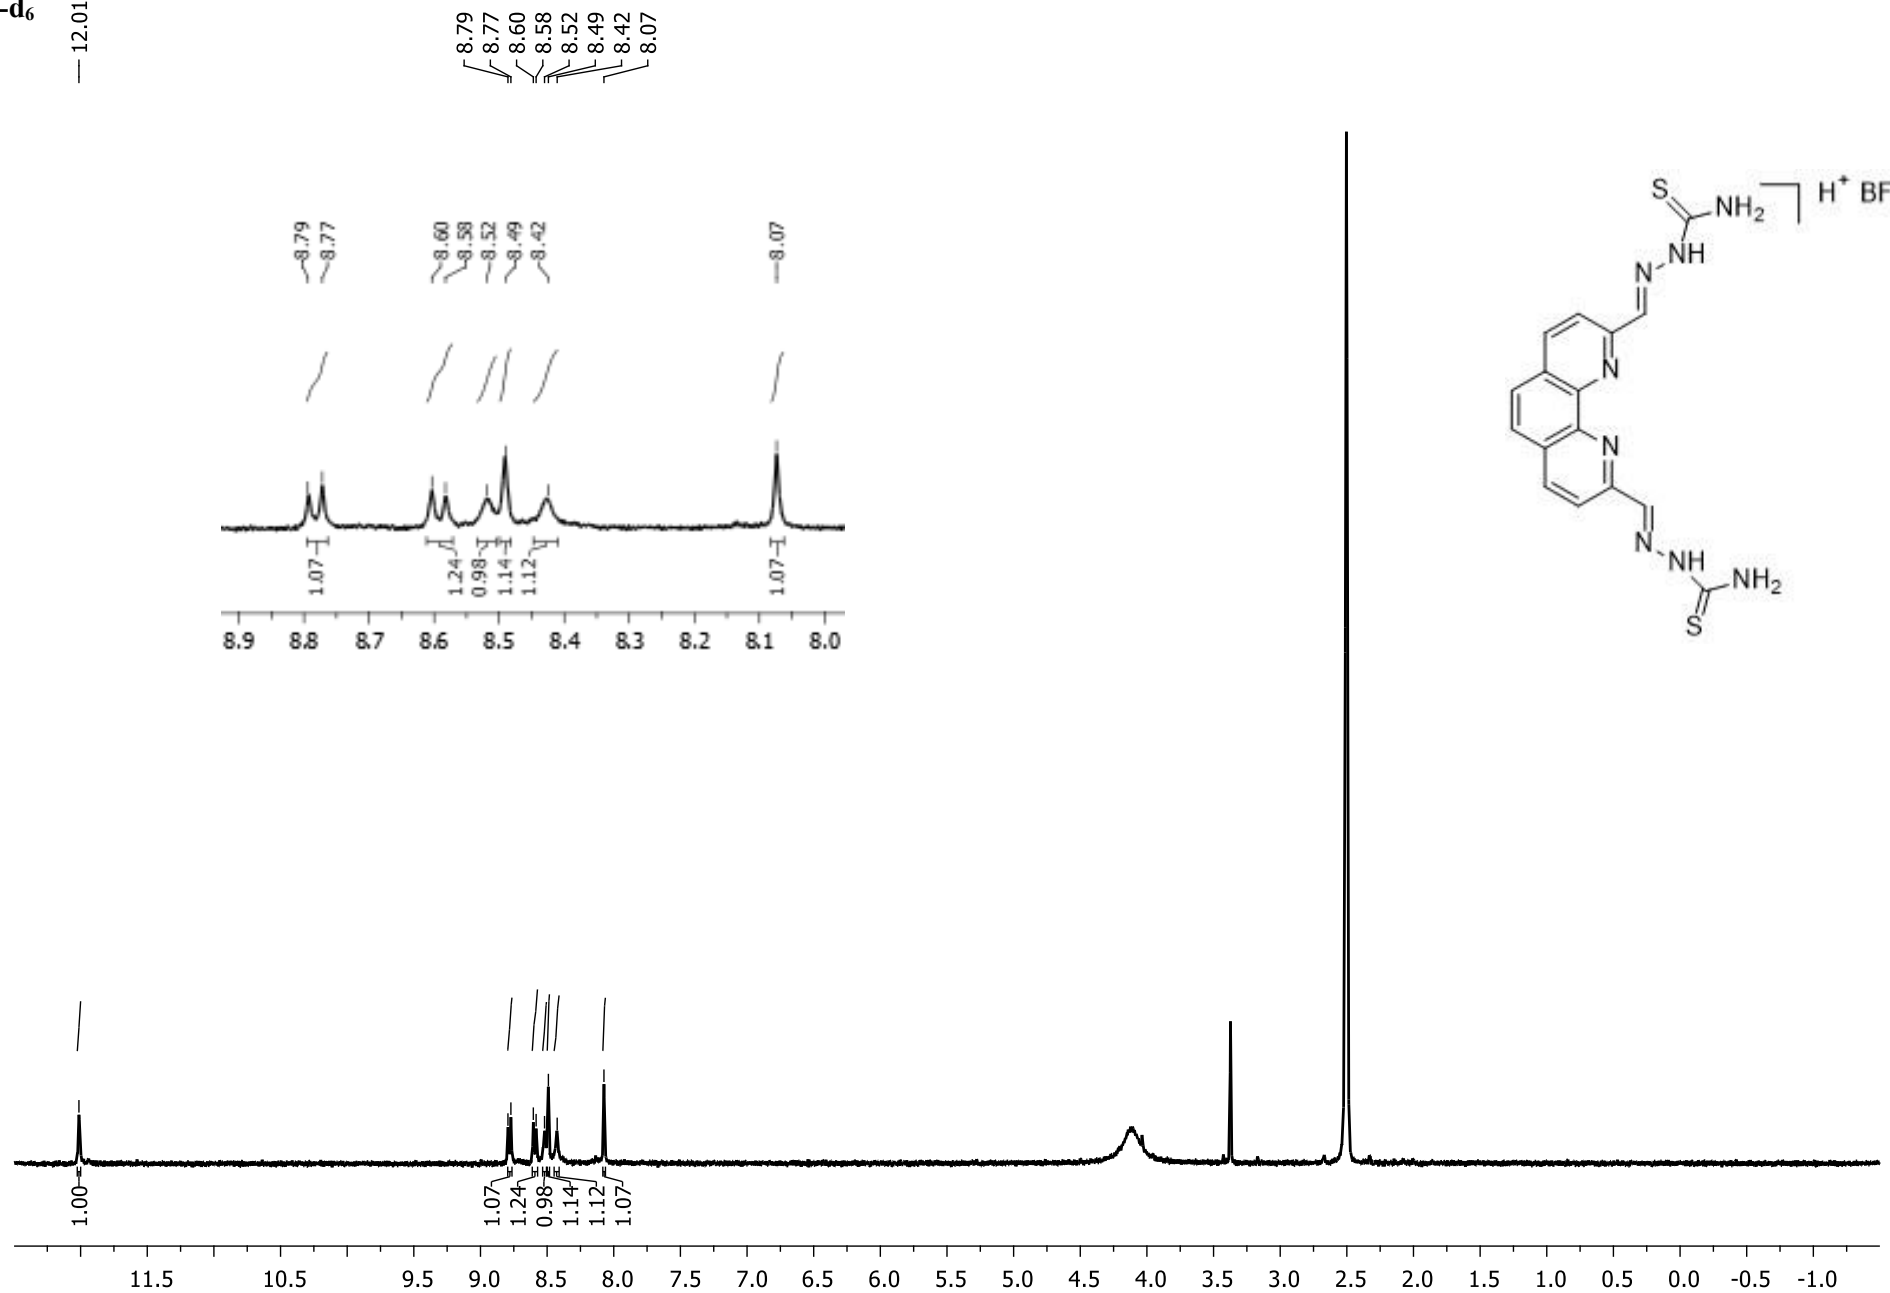

Figure S10. <sup>1</sup>H NMR (400 MHz, DMSO-d<sub>6</sub>) of **3**

DMSO-d<sub>6</sub>

— 179.0

— 153.9

— 144.2

— 142.2

— 137.7

— 129.3

— 127.5

— 120.7

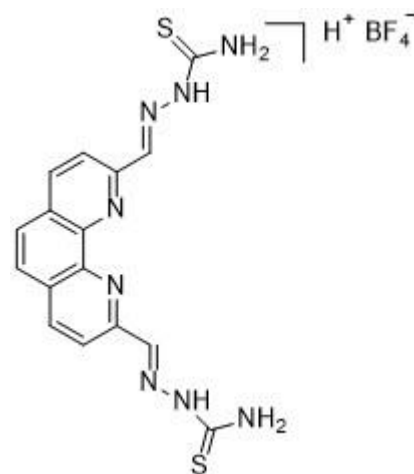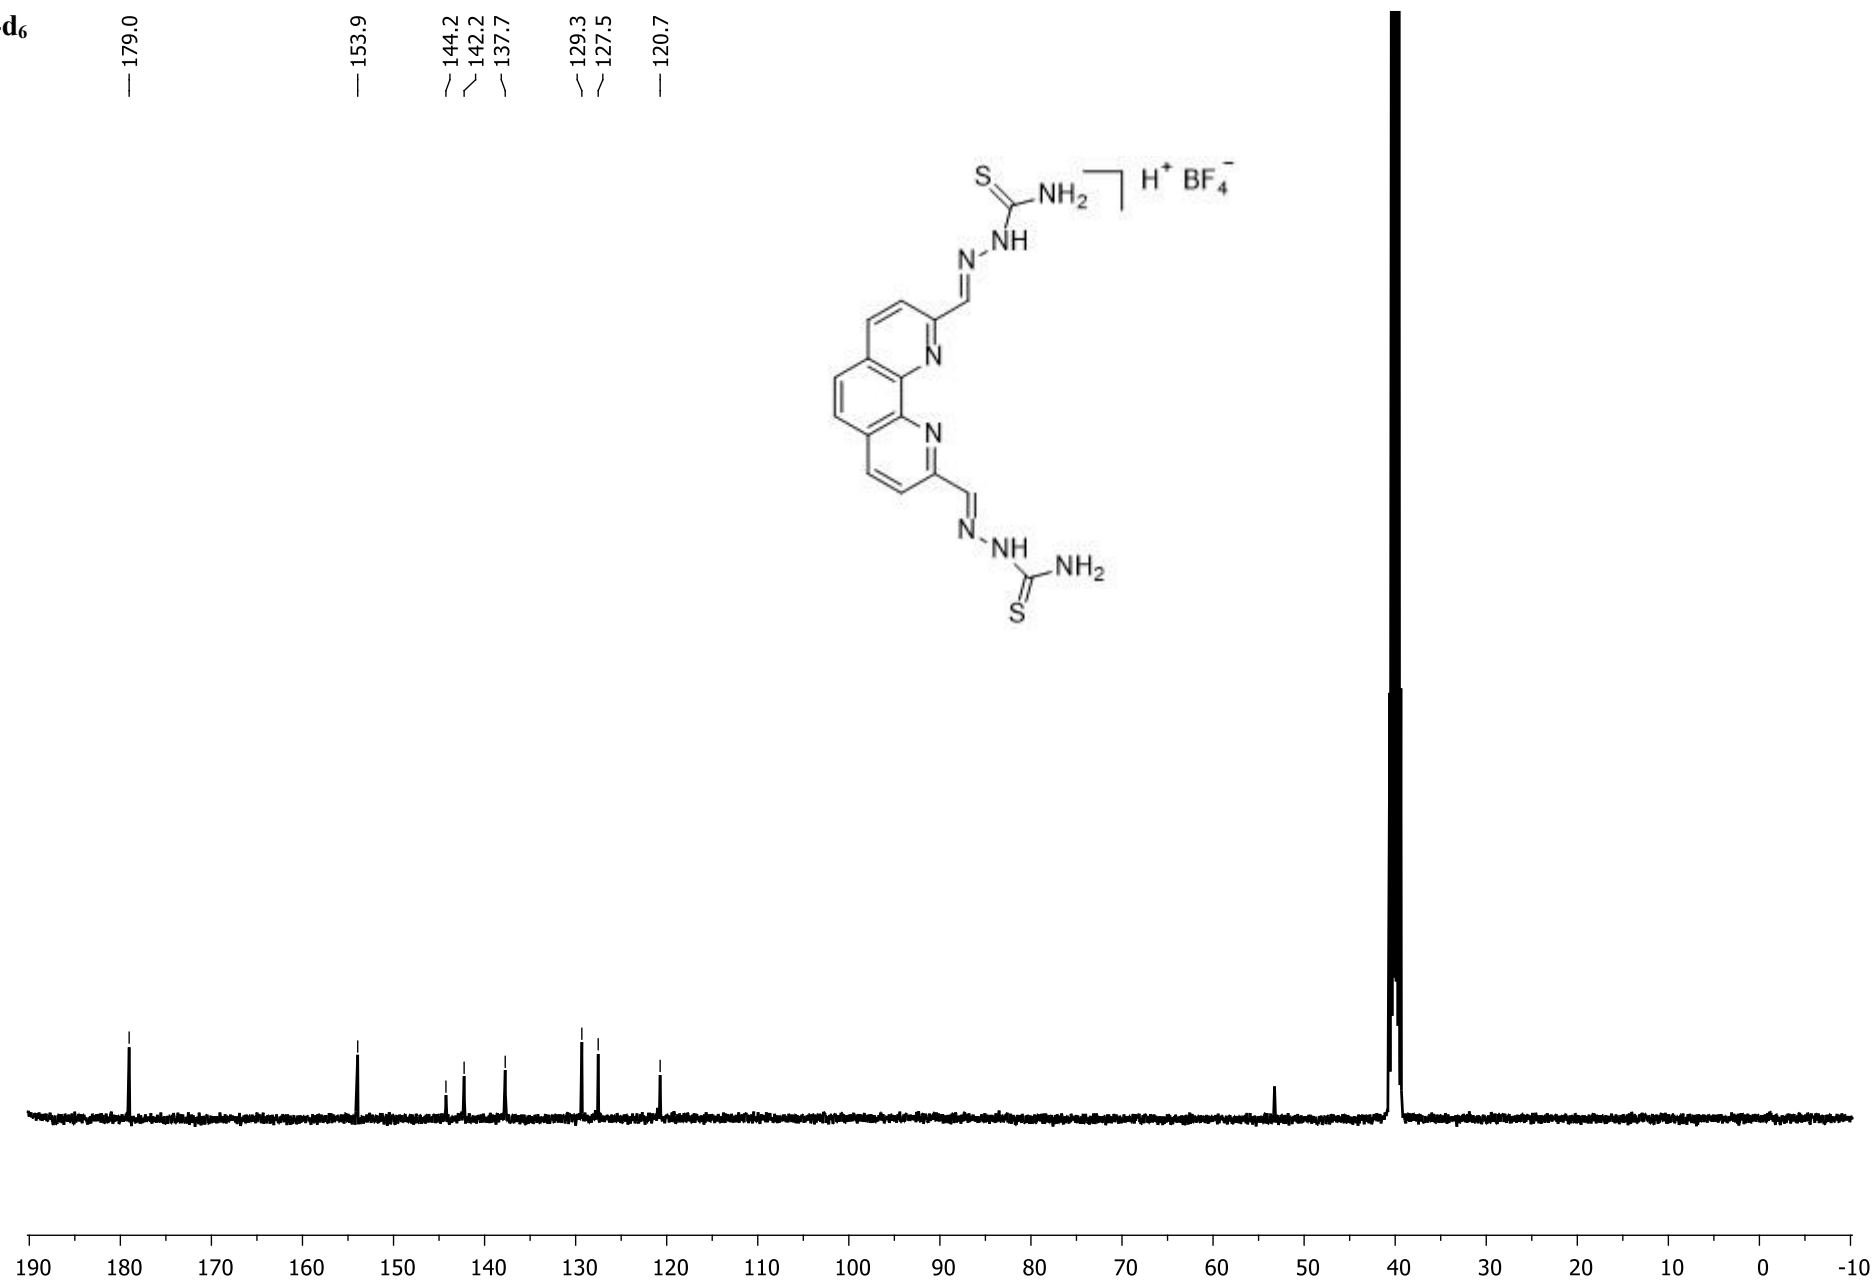

Figure S11. <sup>13</sup>C NMR (101 MHz, DMSO-d<sub>6</sub>) of **3**

DMSO-d<sub>6</sub>

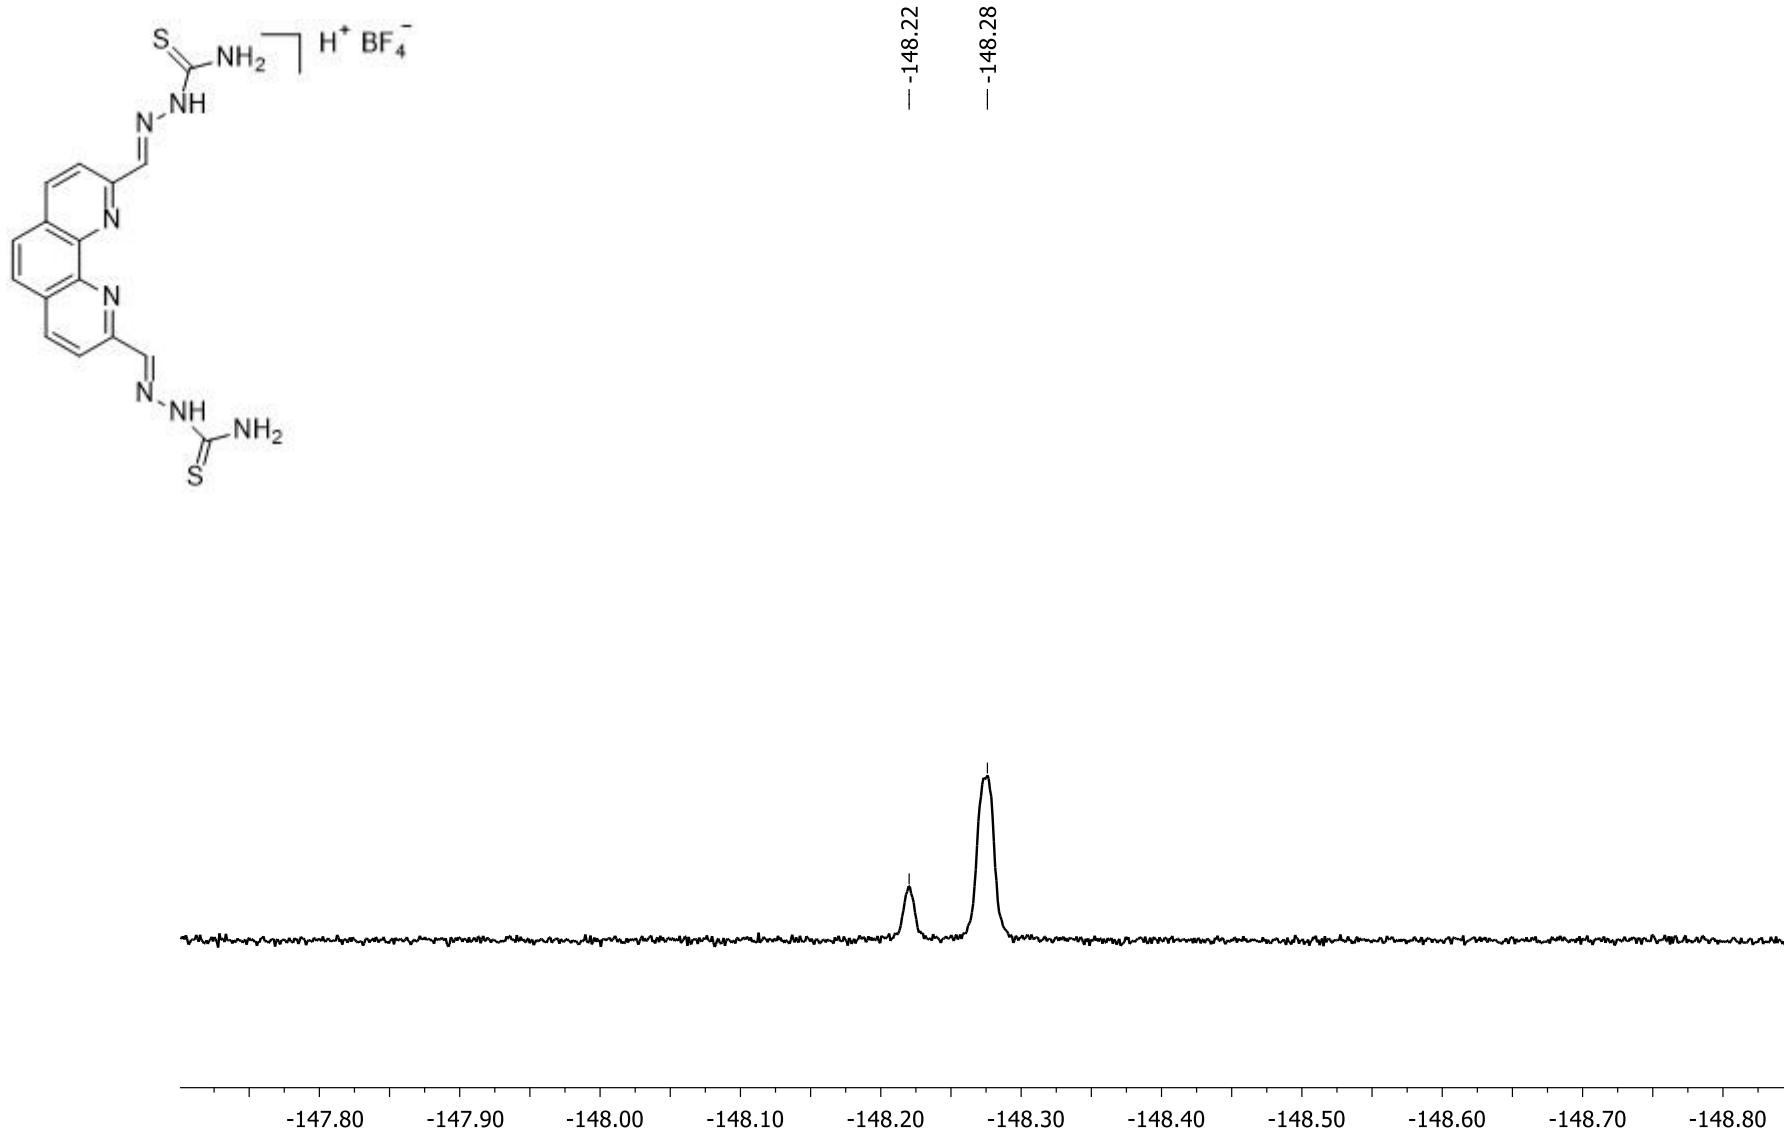

Figure S12. <sup>19</sup>F NMR ((376 MHz, DMSO-d<sub>6</sub>) of 3

DMSO-d<sub>6</sub>

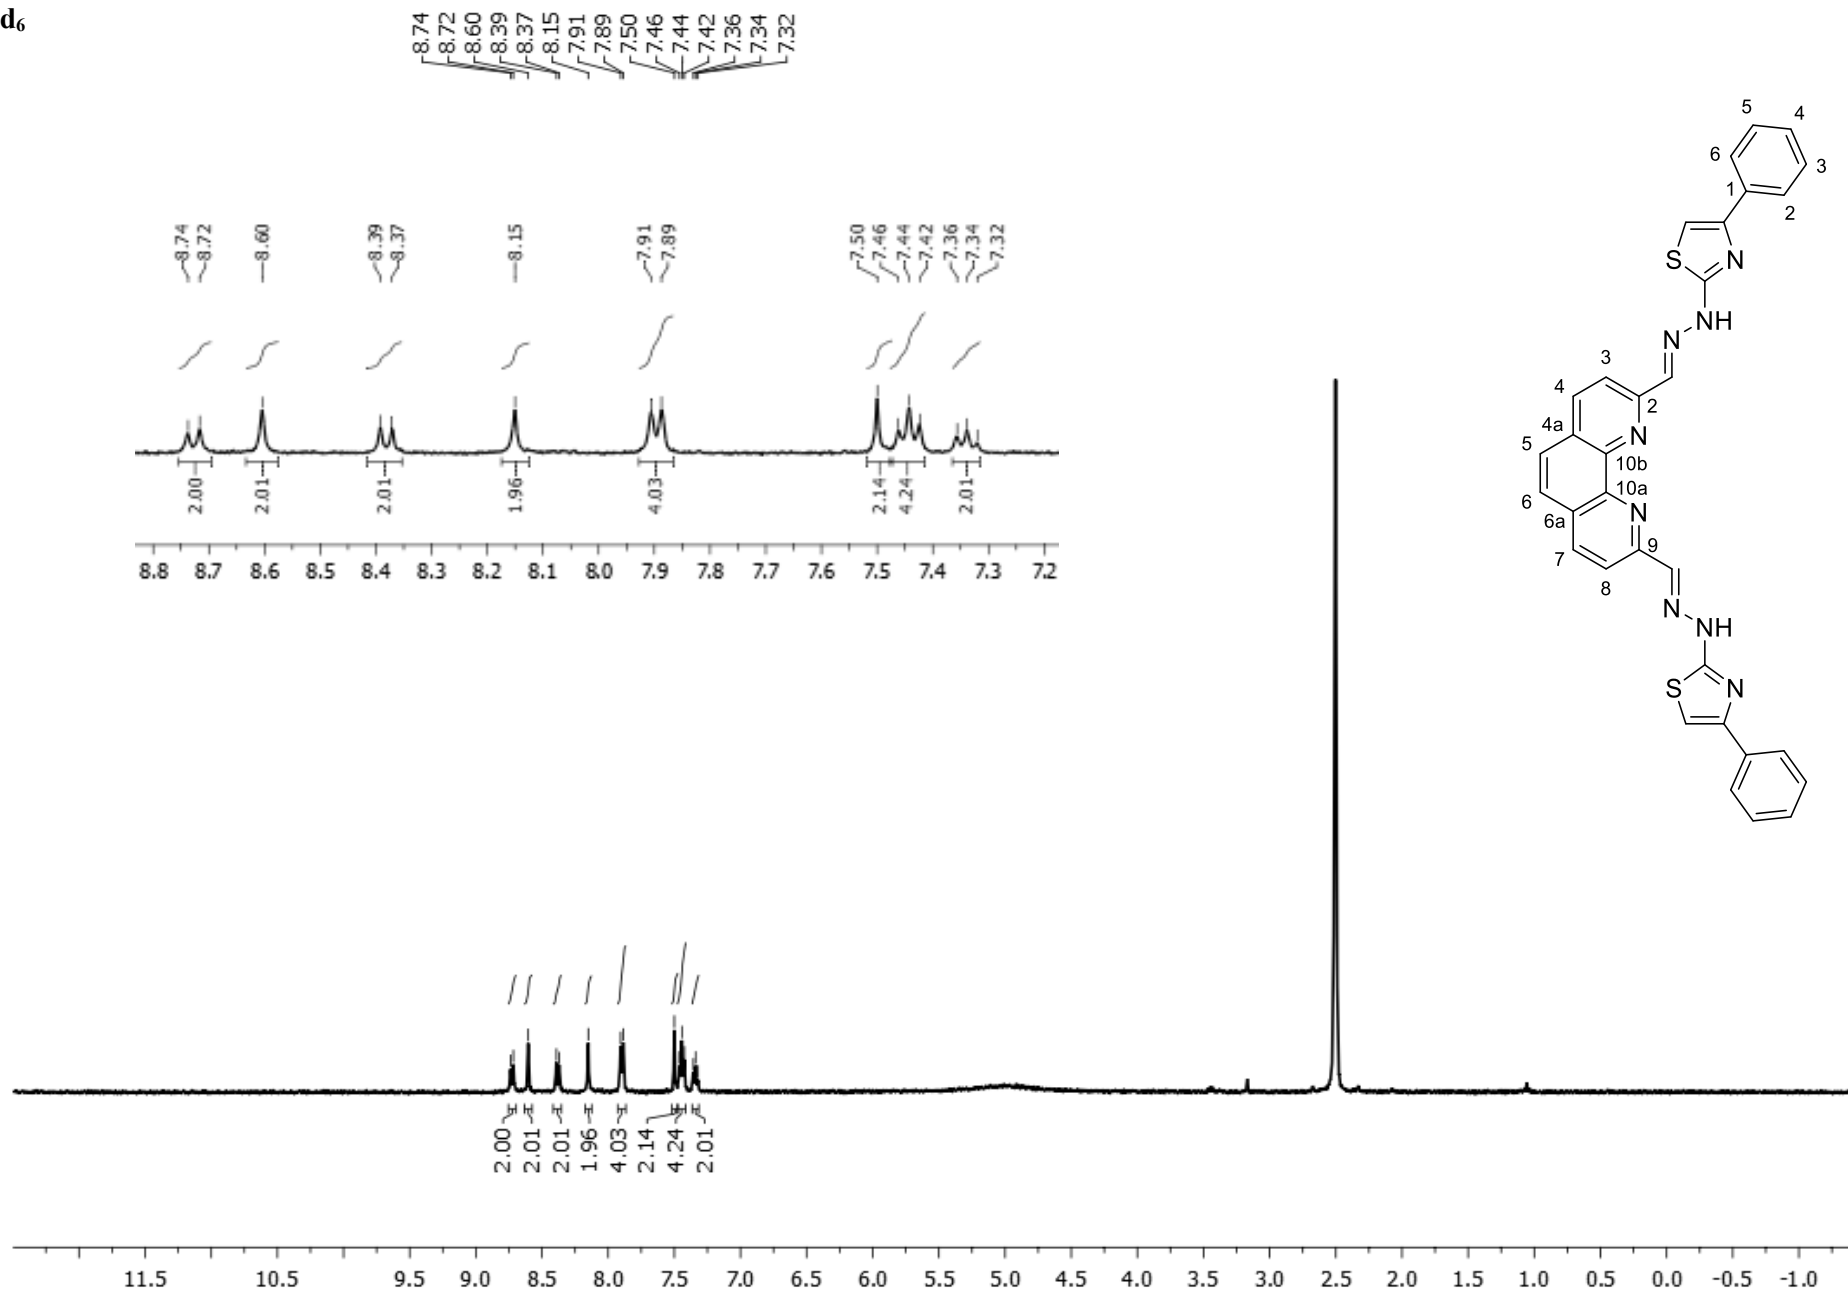

Figure S13. <sup>1</sup>H NMR (400 MHz, DMSO-d<sub>6</sub>) of 4

DMSO-d<sub>6</sub>

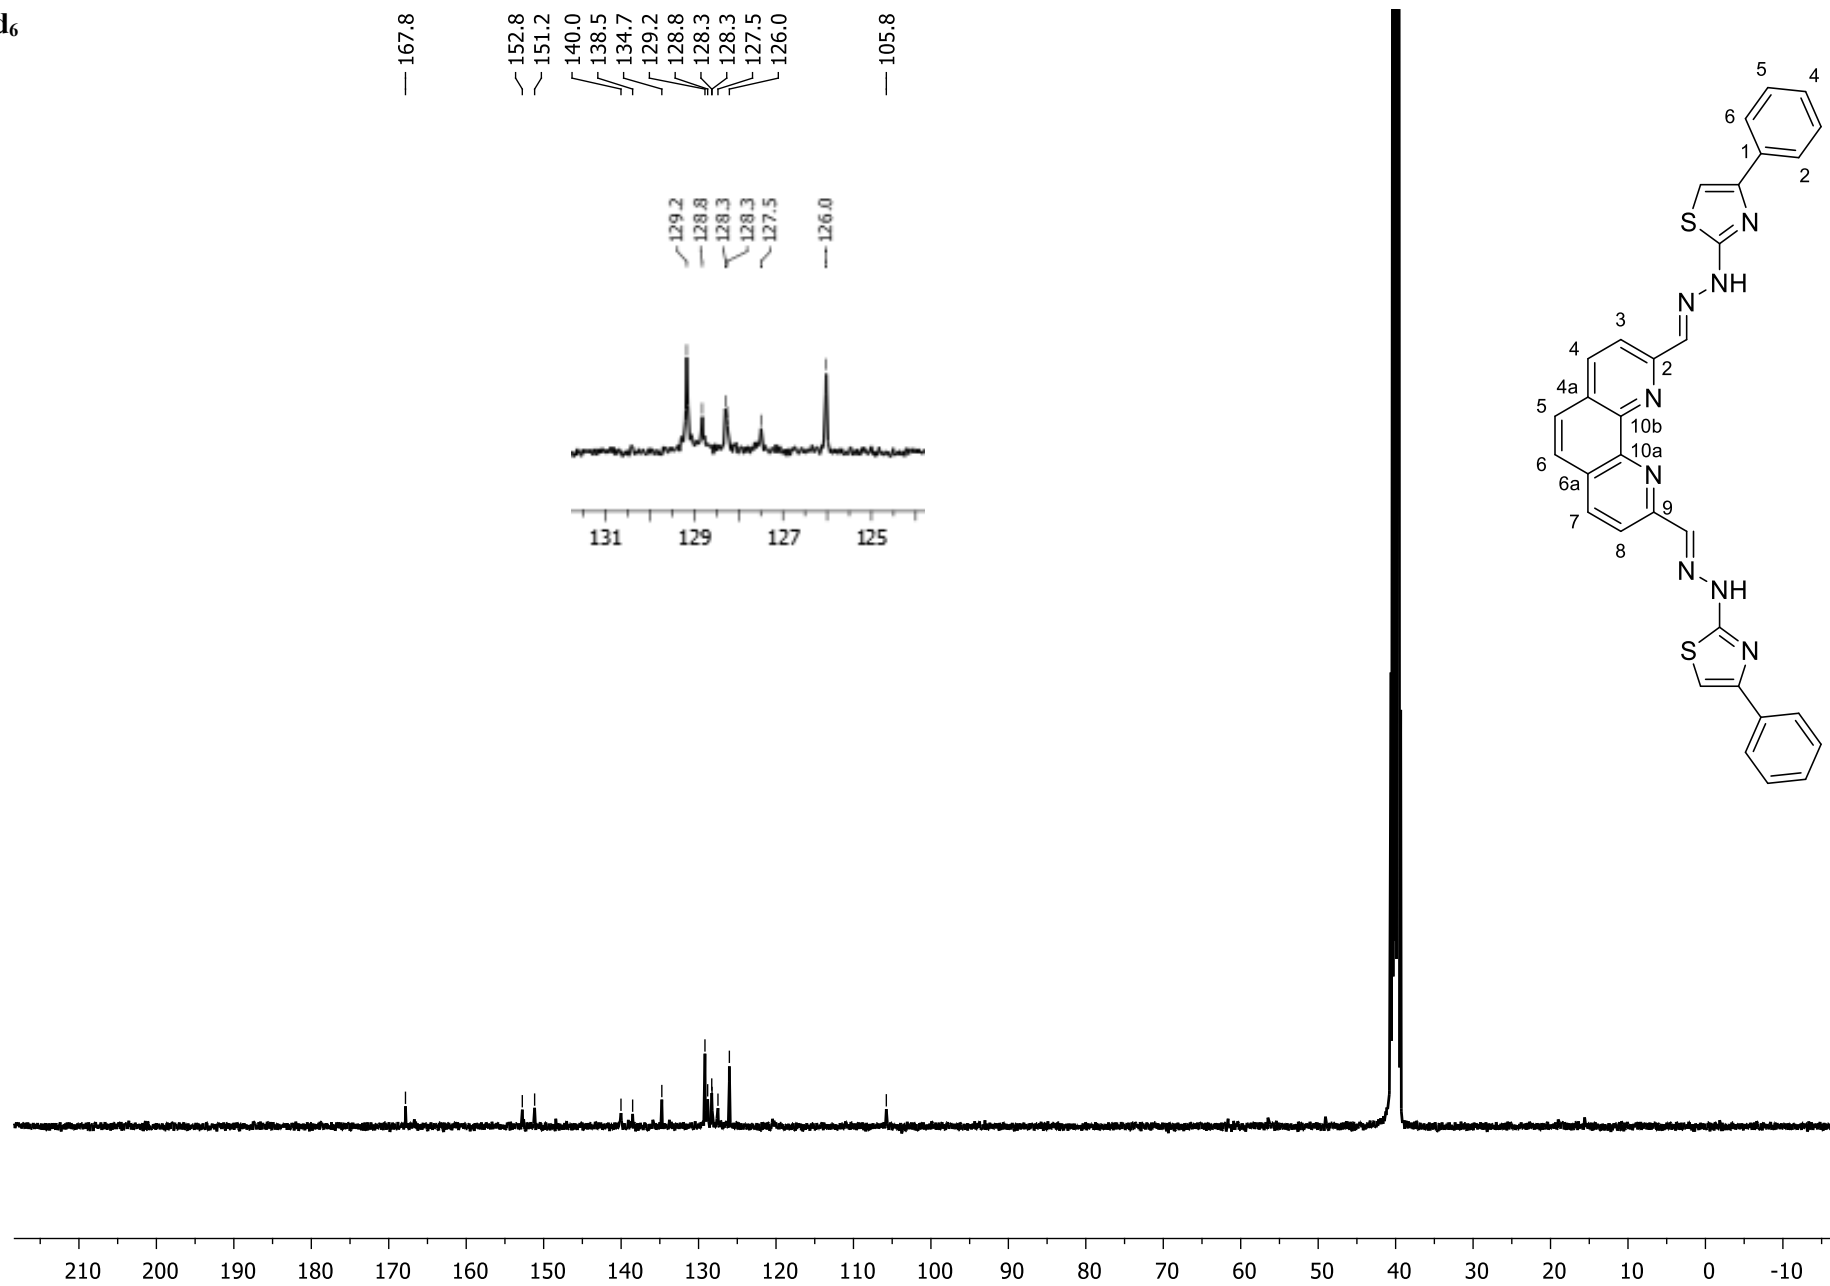

Figure S14. <sup>13</sup>C NMR (101 MHz, DMSO-d<sub>6</sub>) of 4

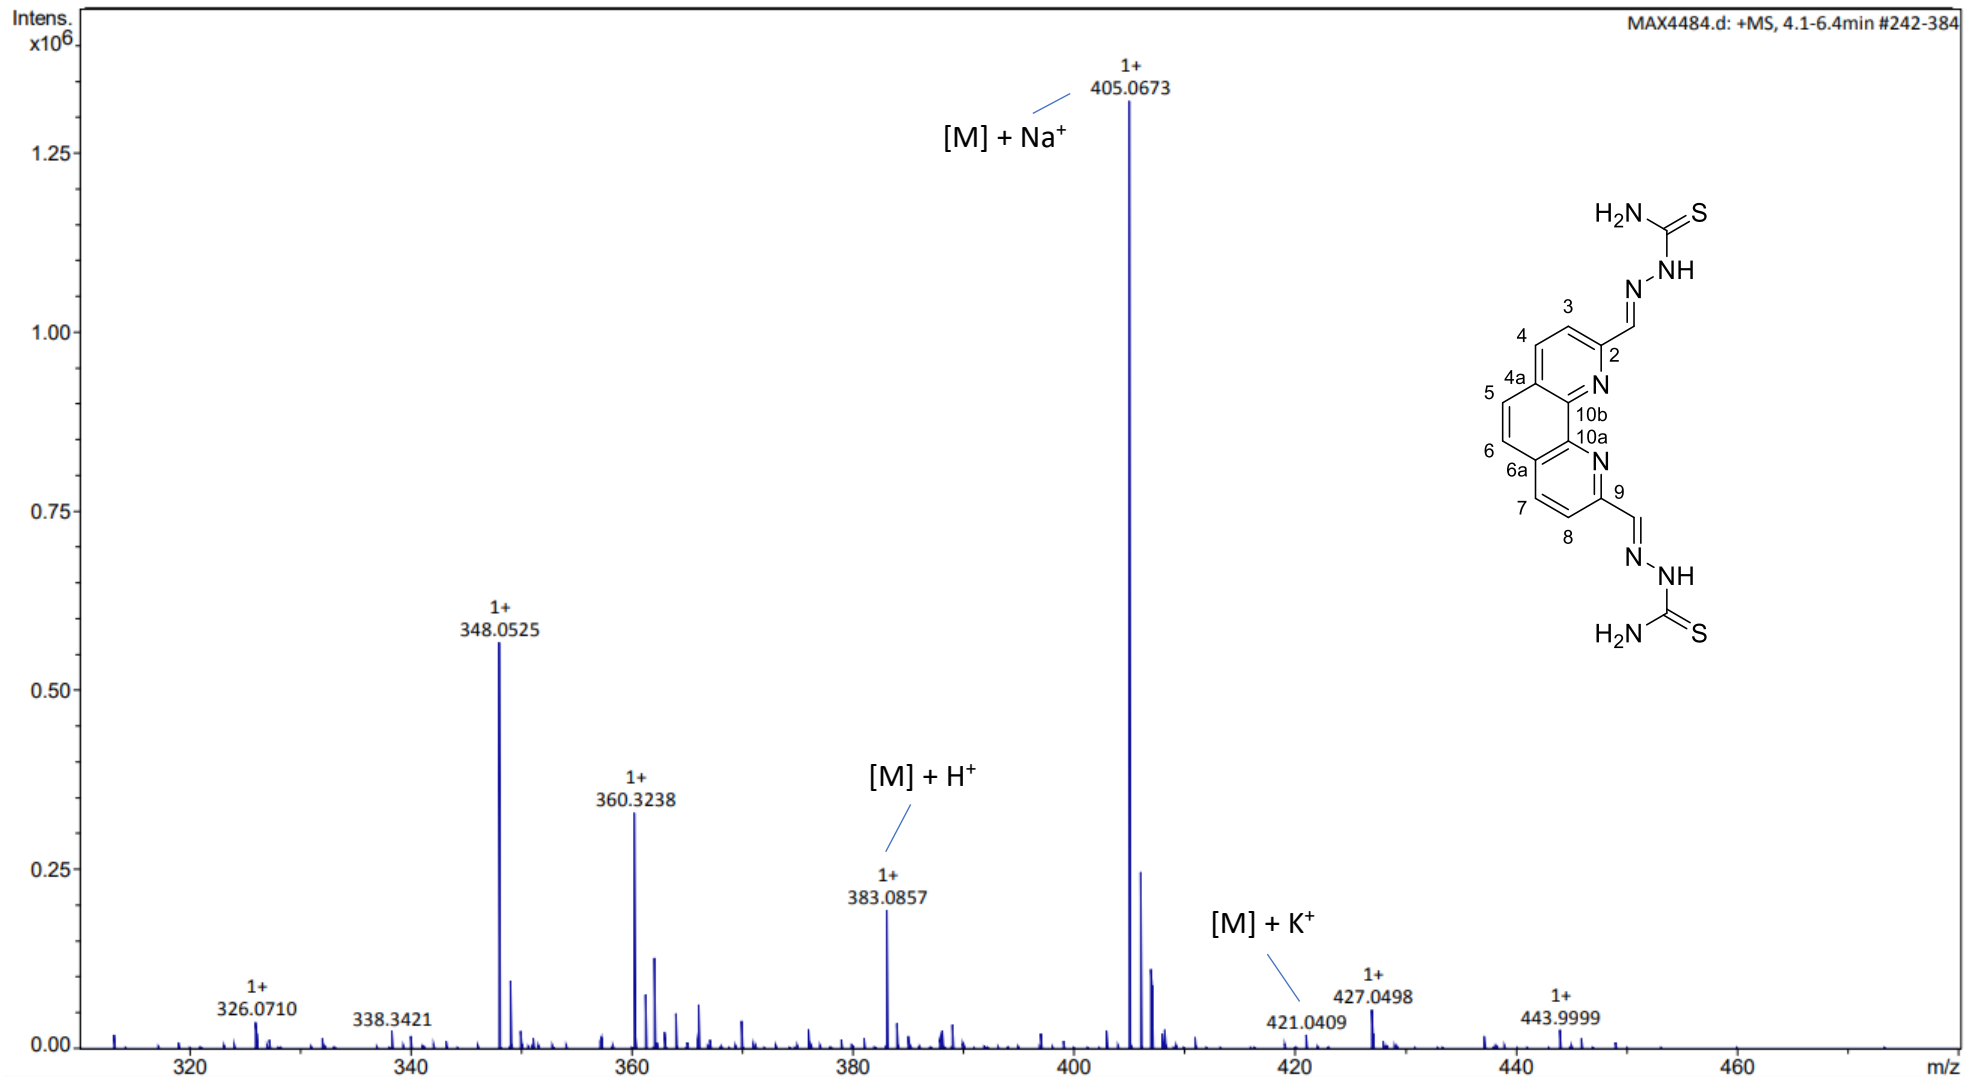

**Figure S15.** Zoomed view of high-resolution electrospray ionization mass spectrum (ESI-HRMS-pos) of **1** (MeOH, 1% formic acid)

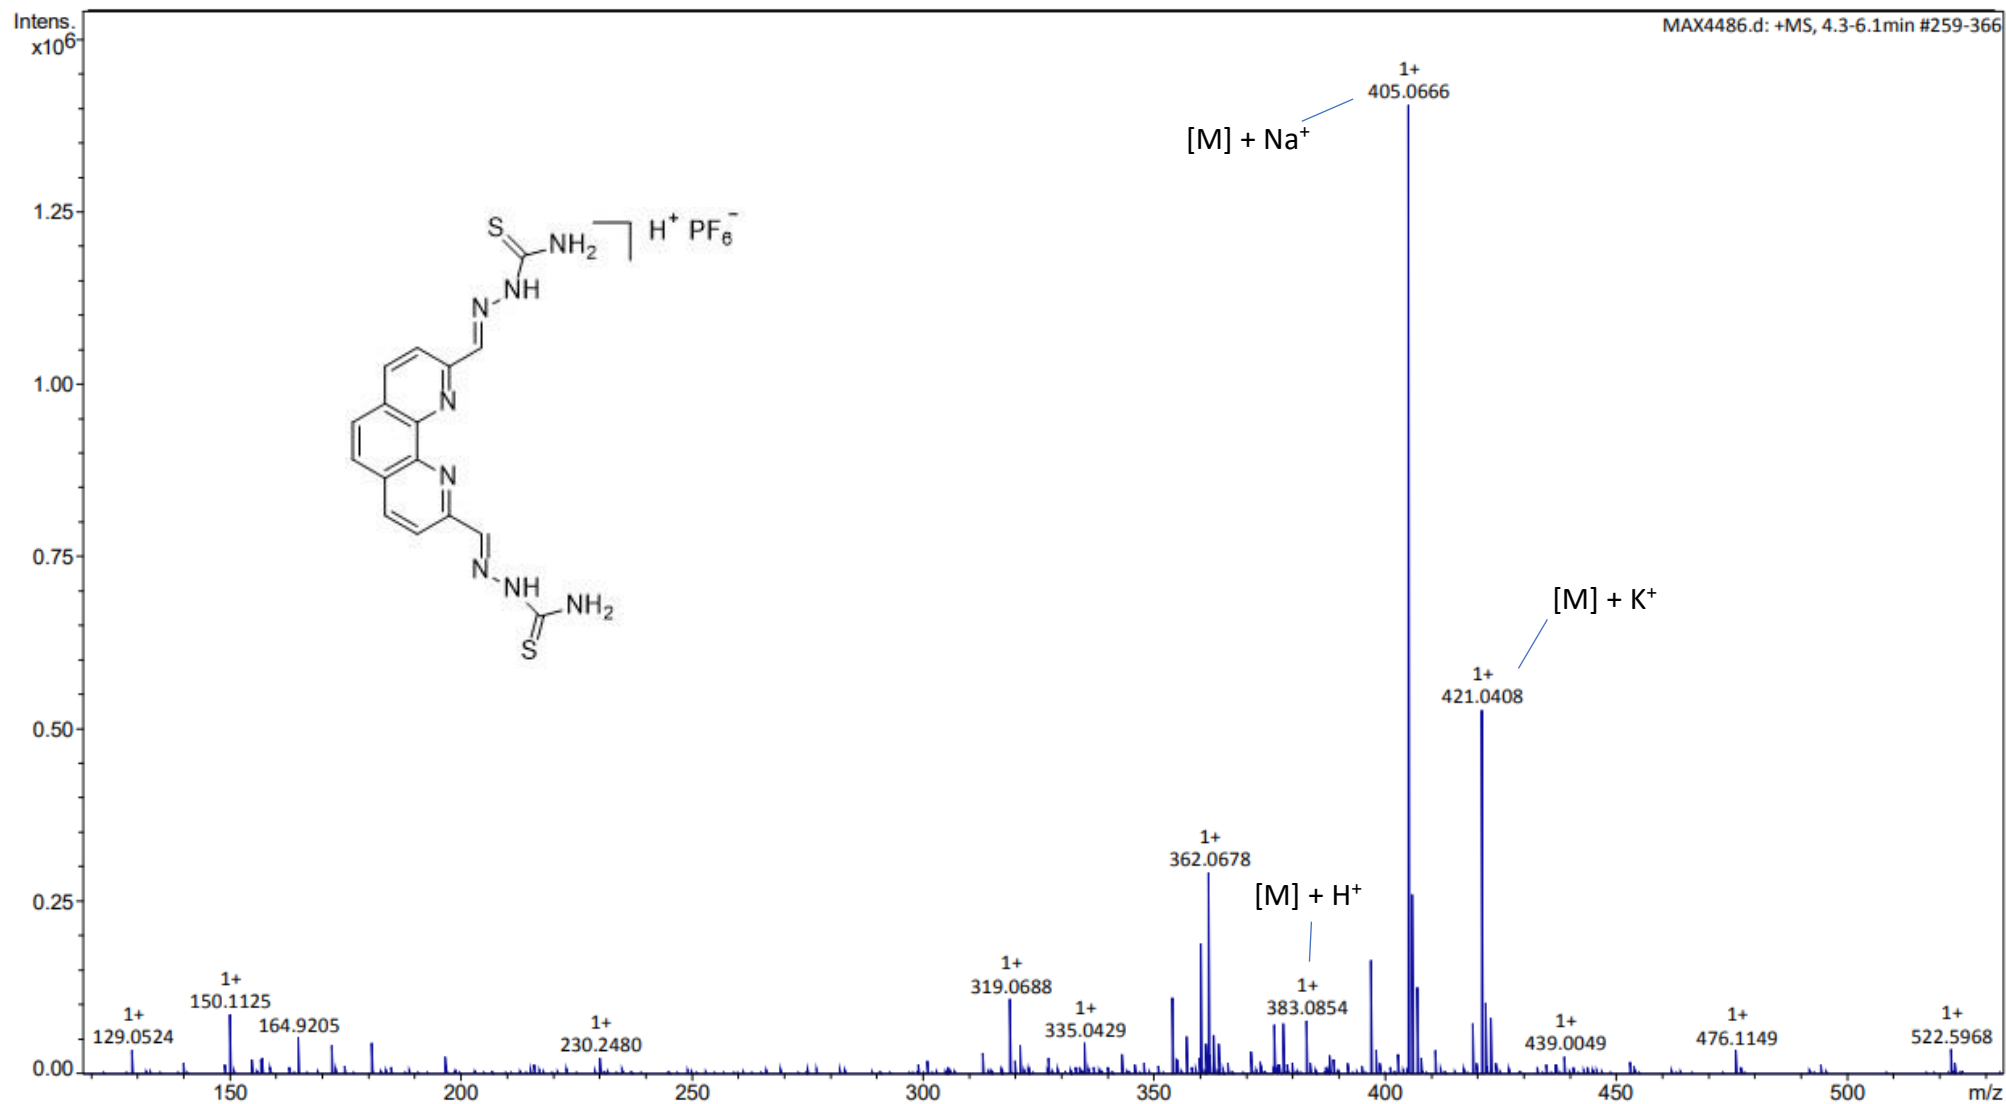

**Figure S16.** Zoomed view of high-resolution electrospray ionization mass spectrum (ESI-HRMS-pos) of **2** (MeOH, 1% formic acid)

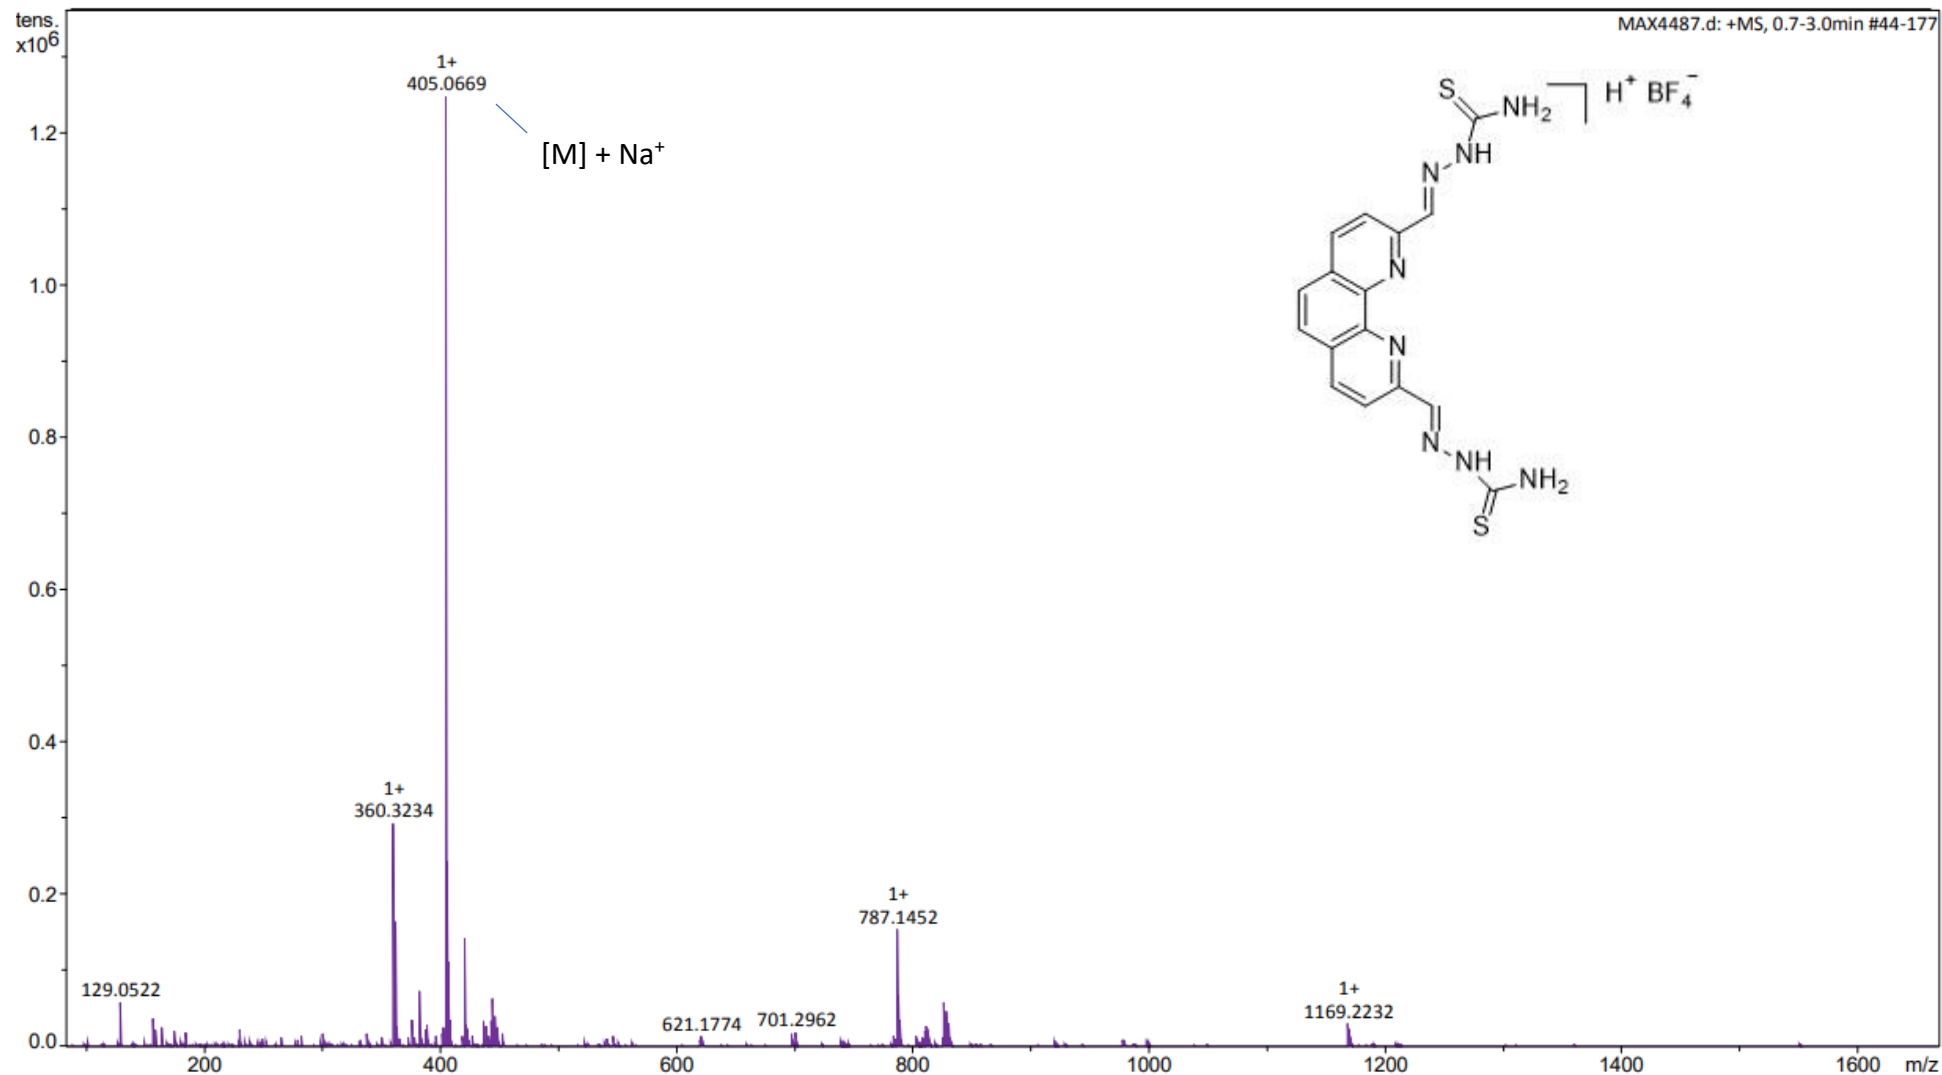

**Figure S17.** High-resolution electrospray ionization mass spectrum (ESI-HRMS-pos) of **3** (MeOH, 1% formic acid)



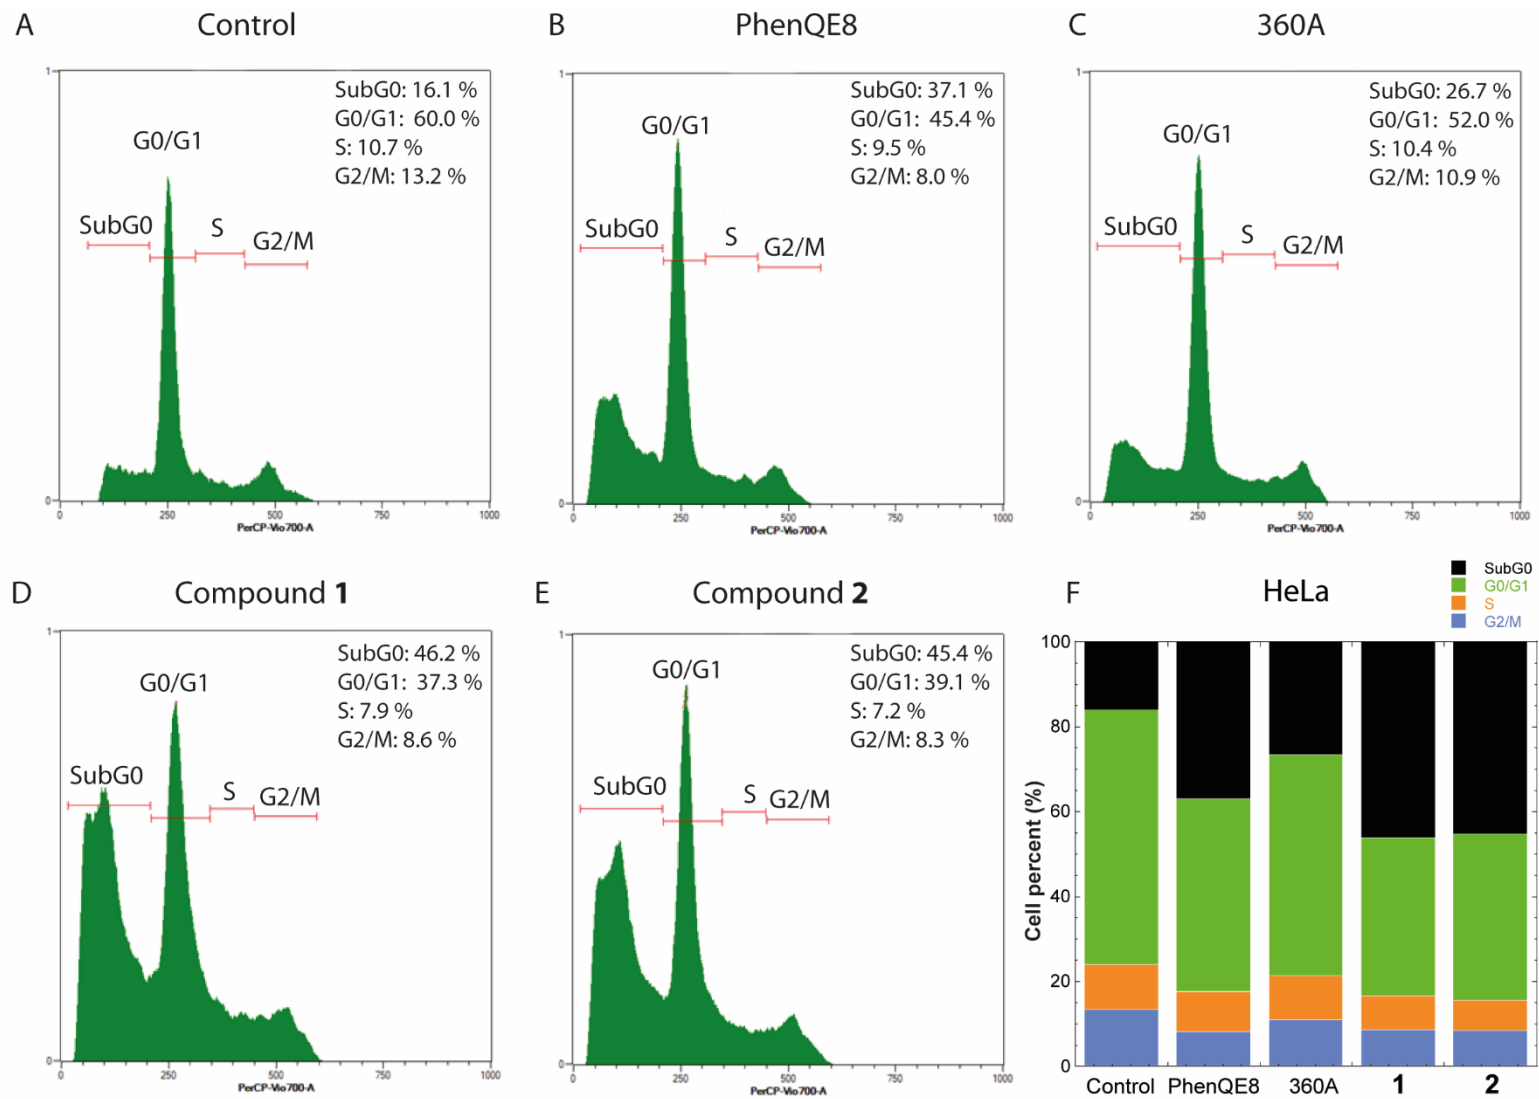

**Figure S19.** Cell cycle histograms of HeLa cells treated with selected compounds **1**, **2** or reference compounds PhenQE8 or 360A at  $\frac{1}{2}$  IC<sub>50</sub> concentrations for 72 h.
